# Supplementary material
Source: Research Square preprint supplement (doi:10.21203/rs.3.rs-9858975/v1)
Supplement: Supplementary file 1 [file d54da0d621afc77dfbfbd119.pdf]

1 The Global Economic Case for Immediate and  
2 Continuous Coastal Adaptation:  
3 *Supporting Information*

4 Vanessa Völz<sup>1\*</sup>, Jochen Hinkel<sup>1,2</sup>, Daniel Lincke<sup>1</sup>,  
5 Lars E. Honsel<sup>1</sup>, Athanasios T. Vafeidis<sup>3</sup>, Sebastiano Bacca<sup>1</sup>

6 <sup>1</sup>Global Climate Forum, Neue Promenade 6, 10178, Berlin, Germany.

7 <sup>2\*</sup>Thaer-Institute of Agricultural and Horticultural Sciences,  
8 Humboldt-Universität zu Berlin, Unter den Linden 6, 10099, Berlin,  
9 Germany.

10 <sup>3\*</sup>Coastal Risks and Sea Level Rise Research Group, Department of  
11 Geography, Christian-Albrechts University, Ludewig-Meyn-Straße 8,  
12 24118, Kiel, Germany.

13 \*Corresponding author(s). E-mail(s):

14 [vanessa.voelz@globalclimateforum.org](mailto:vanessa.voelz@globalclimateforum.org);

15 Contributing authors: [hinkel@globalclimateforum.org](mailto:hinkel@globalclimateforum.org);

16 [daniel.lincke@globalclimateforum.org](mailto:daniel.lincke@globalclimateforum.org);

17 [lars.honsel@globalclimateforum.org](mailto:lars.honsel@globalclimateforum.org); [vafeidis@geographie.uni-kiel.de](mailto:vafeidis@geographie.uni-kiel.de);

18 [sebastiano.bacca@globalclimateforum.org](mailto:sebastiano.bacca@globalclimateforum.org);

19 **1 Supplementary Information**

20 This supplementary information contains adaptation investment visualisations over  
21 time for the medium climate change scenario (Figure S1) and information on the low  
22 climate change scenario (Figure S2, S3, S4), high climate change scenario (Figure S5,  
23 S6, S7) and counterfactual scenario without sea-level rise (Figure S8, S9). We also  
24 provide detailed results for all countries under low, medium and high climate change  
25 scenarios (Table S1) and cost data for all countries (Table S2).

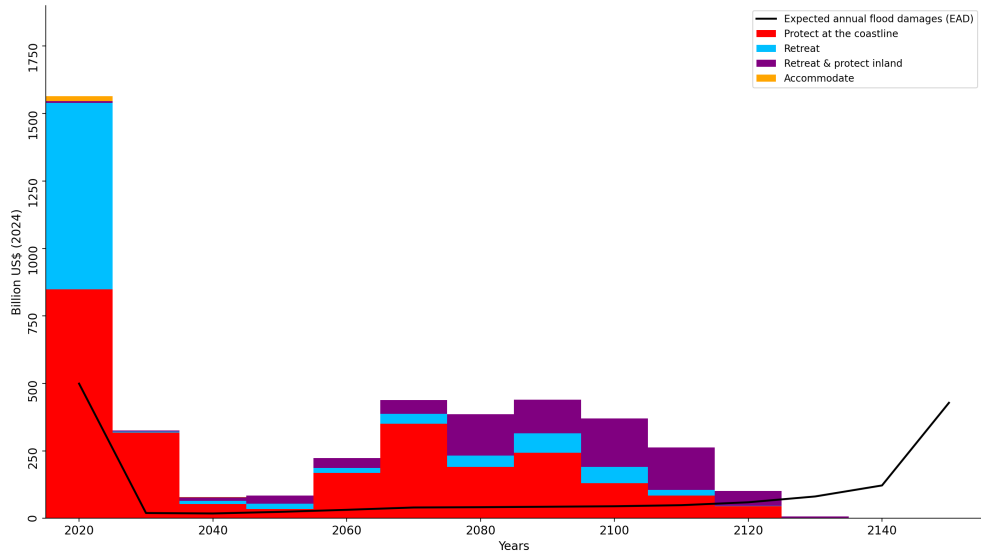

**Fig. S1:** Adaptation investments for each adaptation option (stacked bar plots) and expected annual flood damage (EAD) (black line), shown undiscounted, over time and aggregated across all floodplains under SSP2-4.5.

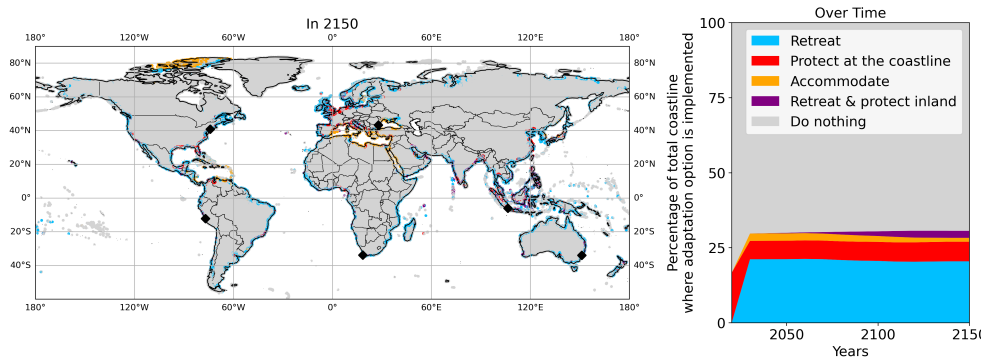

**Fig. S2:** Implemented adaptation options across floodplains and over time under SSP1-2.6. A map (left) showing the final adaptation option implemented per floodplain in 2150 and a graph (right) showing the percentage of the entire coastline where each adaptation option is implemented over time under SSP1-2.6.

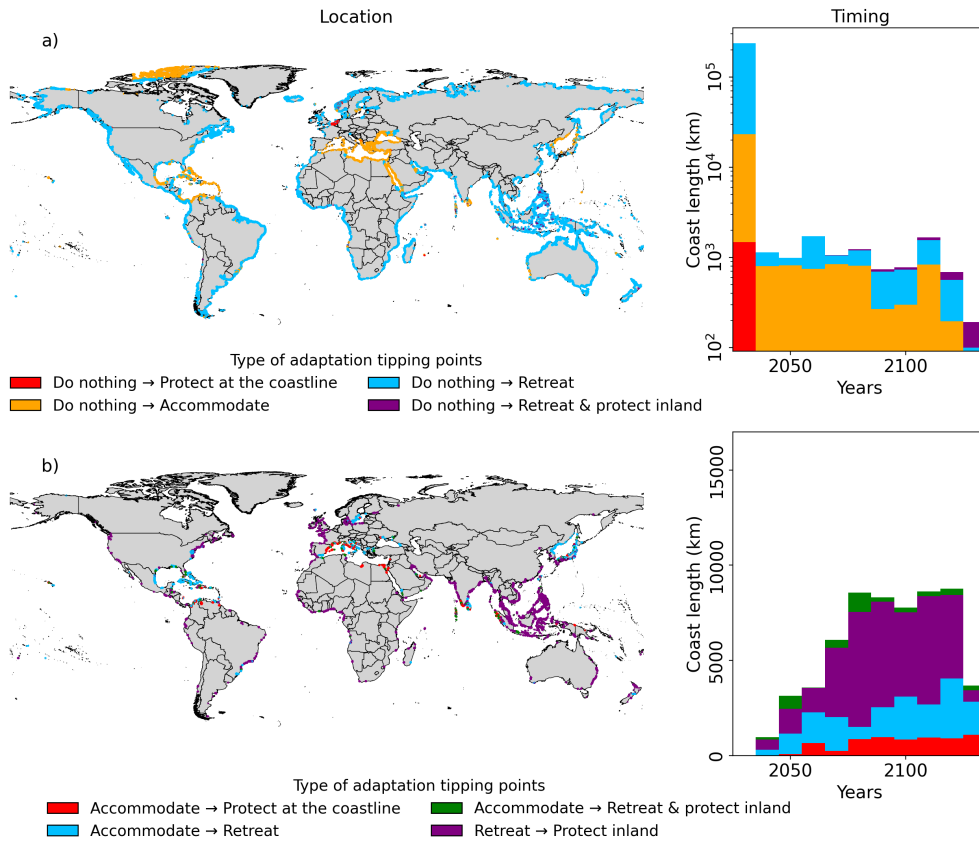

**Fig. S3: The geographic location and timing of adaptation tipping points under SSP1-2.6.** For adaptation tipping points where (a) doing nothing becomes insufficient and (b) another option becomes insufficient, a map (left) shows the geographic location and a stacked bar chart (right) illustrates the timing (x-axis) for the accumulated length of coastline (y-axis) for all floodplains under SSP1-2.6.

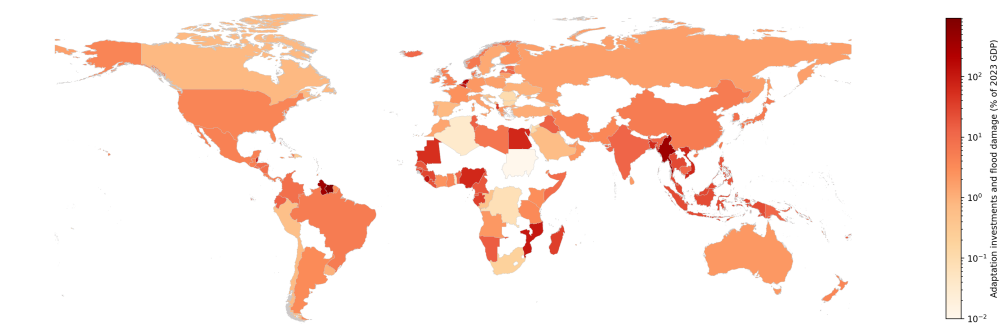

**Fig. S4: Relative cost burden per country under SSP1-2.6.** A map showing the discounted adaptation investments and expected residual flood damages over the entire time horizon relative to each countries GDP in 2023 under SSP1-2.6.

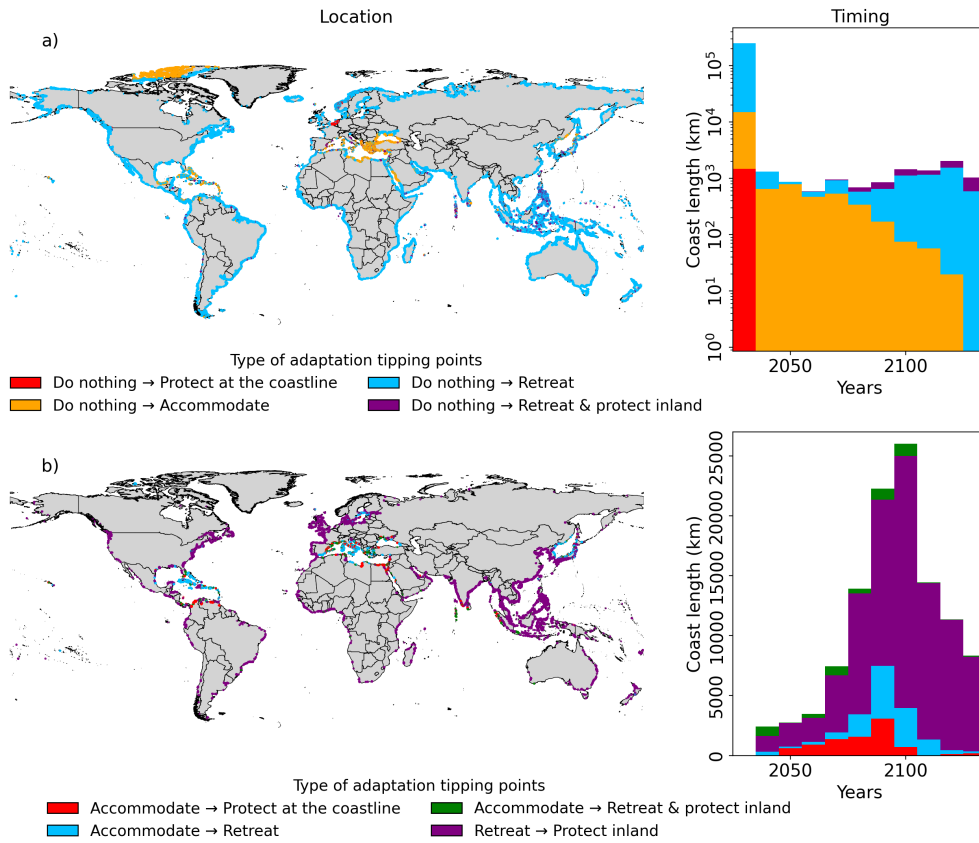

**Fig. S5: The geographic location and timing of adaptation tipping points under SSP5-8.5.** For adaptation tipping points where (a) doing nothing becomes insufficient and (b) another option becomes insufficient, a map (left) shows the geographic location and a stacked bar chart (right) illustrates the timing (x-axis) for the accumulated length of coastline (y-axis) for all floodplains under SSP5-8.5.

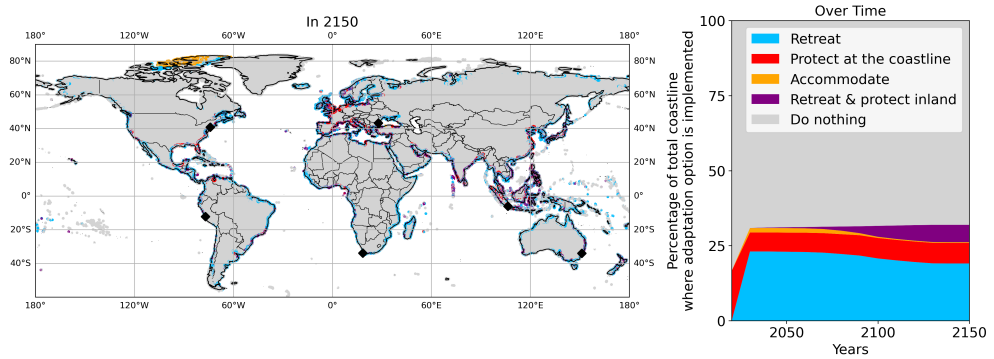

**Fig. S6: Implemented adaptation options across floodplains and over time under SSP5-8.5.** A map (left) showing the final adaptation option implemented per floodplain in 2150 and a graph (right) showing the percentage of the entire coastline where each adaptation option is implemented over time under SSP5-8.5.

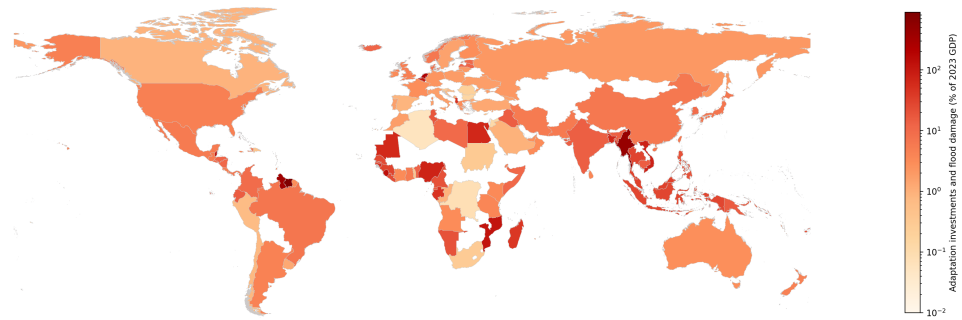

**Fig. S7: Relative cost burden per country under SSP5-8.5.** A map showing the discounted adaptation investments and expected residual flood damages over the entire time horizon relative to each countries GDP in 2023 under SSP5-8.5.

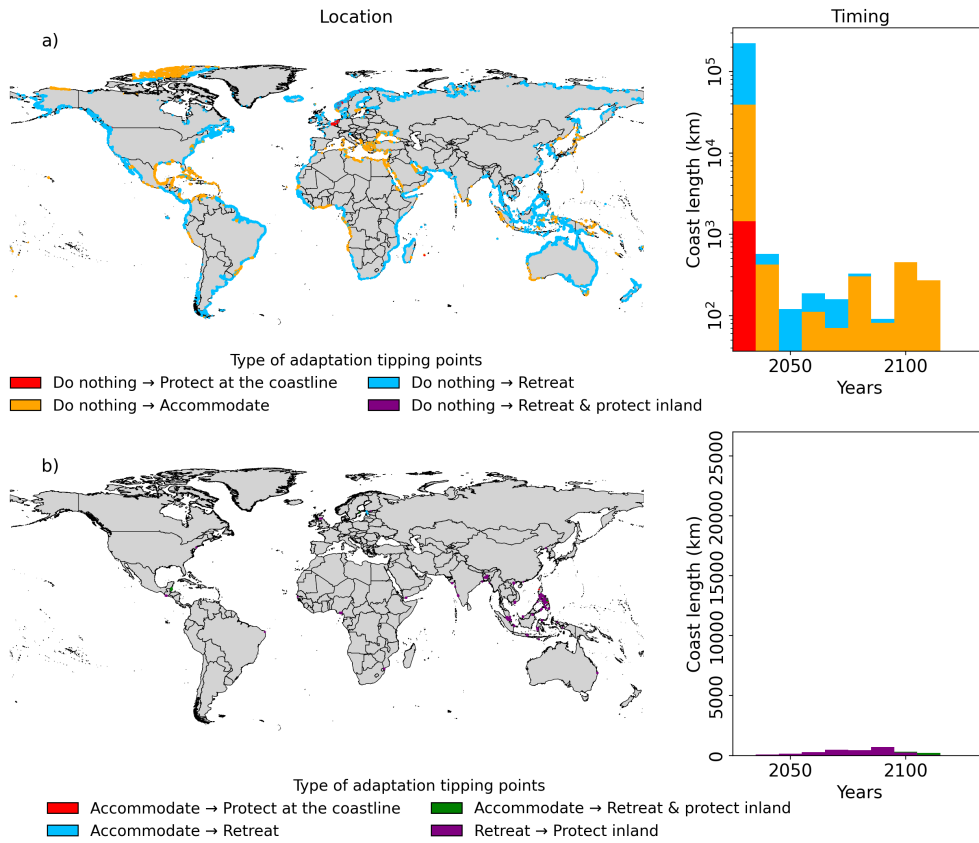

**Fig. S8: The geographic location and timing of adaptation tipping points without sea-level rise.** For adaptation tipping points where (a) doing nothing becomes insufficient and (b) another option becomes insufficient, a map (left) shows the geographic location and a stacked bar chart (right) illustrates the timing (x-axis) for the accumulated length of coastline (y-axis) for all floodplains under SSP2 and no sea-level rise.

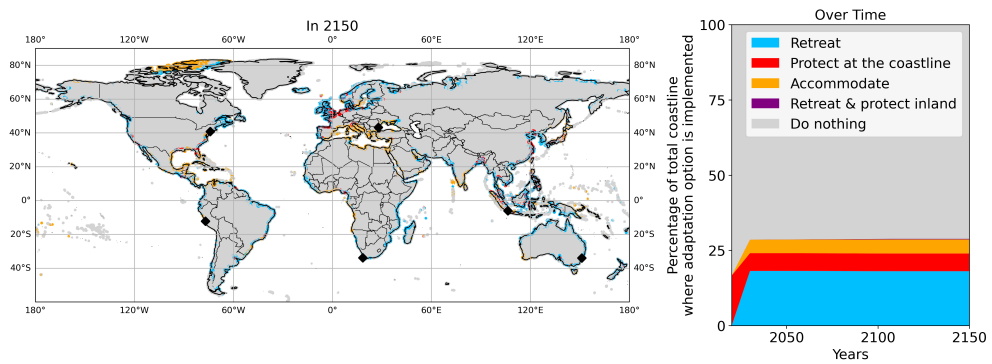

**Fig. S9: Implemented adaptation options across floodplains and over time without sea-level rise.** A map (left) showing the final adaptation option implemented per floodplain in 2150 and a graph (right) showing the percentage of the entire coastline where each adaptation option is implemented over time under SSP2 and no sea-level rise.

**Table S1:** The proportion of the coastline for which different adaptation options are implemented in 2150, along with the net present value of adaptation investments, residual expected flood damages and the total costs over the full time horizon (2020–2150) and as relative percentage to GDP. Results are shown per country for different climate scenarios: SSP2-4.5 (SSP1-2.6, SSP5-5.8).

| Country                           | Coast length (km) | Protect at the coastline (%) | Retreat (%)       | Accommodate (%)  | Retreat and protect inland (%) | Do nothing (%)       | Adaptation investments (bil. US\$) | Flood damages (bil. US\$) | Total costs (bil. US\$) | Relative costs (% of GDP) |
|-----------------------------------|-------------------|------------------------------|-------------------|------------------|--------------------------------|----------------------|------------------------------------|---------------------------|-------------------------|---------------------------|
| Aaland                            | 3550              | 0.0 (0.0, 0.0)               | 6.9 (2.2, 9.3)    | 1.3 (6.0, 0.1)   | 0.0 (0.0, 0.0)                 | 91.7 (91.8, 90.5)    | 0.4 (0.4, 0.4)                     | 0.0 (0.0, 0.0)            | 0.4 (0.4, 0.4)          | - (-, -)                  |
| Albania                           | 540               | 48.5 (47.9, 48.5)            | 4.2 (2.9, 4.0)    | 0.0 (2.0, 0.0)   | 0.0 (0.0, 0.3)                 | 47.2 (47.2, 47.2)    | 0.9 (0.8, 1.3)                     | 10.6 (10.4, 10.5)         | 11.6 (11.1, 11.7)       | 50.3 (48.4, 51.0)         |
| Algeria                           | 1399              | 0.7 (0.0, 0.8)               | 1.3 (0.0, 1.2)    | 0.4 (3.4, 0.0)   | 1.1 (0.0, 2.1)                 | 96.5 (96.6, 95.9)    | 0.0 (0.0, 0.1)                     | 0.1 (0.1, 0.1)            | 0.1 (0.1, 0.1)          | 0.0 (0.0, 0.1)            |
| Angola                            | 2495              | 1.9 (1.9, 1.9)               | 19.3 (18.4, 18.1) | 0.0 (0.0, 0.0)   | 7.1 (6.3, 11.6)                | 71.8 (73.4, 68.4)    | 1.2 (1.1, 1.6)                     | 0.8 (0.8, 0.9)            | 2.0 (1.8, 2.5)          | 2.3 (2.2, 3.0)            |
| Anguilla                          | 92                | 0.0 (0.0, 0.0)               | 2.5 (0.0, 10.7)   | 6.5 (7.9, 0.0)   | 0.0 (0.0, 0.0)                 | 91.0 (92.1, 89.3)    | 0.0 (0.0, 0.0)                     | 0.0 (0.0, 0.0)            | 0.0 (0.0, 0.0)          | - (-, -)                  |
| Antigua and Barbuda               | 277               | 0.0 (0.0, 0.0)               | 0.0 (0.0, 3.4)    | 4.9 (4.0, 2.1)   | 0.0 (0.0, 0.7)                 | 95.1 (96.0, 93.7)    | 0.0 (0.0, 0.0)                     | 0.0 (0.0, 0.0)            | 0.0 (0.0, 0.0)          | 1.2 (1.2, 1.5)            |
| Argentina                         | 13302             | 0.9 (0.9, 0.9)               | 39.6 (40.9, 37.7) | 0.0 (0.0, 0.0)   | 2.8 (0.7, 5.0)                 | 56.7 (57.5, 56.3)    | 16.0 (13.5, 21.4)                  | 6.8 (7.0, 6.8)            | 22.8 (20.5, 28.2)       | 3.6 (3.2, 4.4)            |
| Aruba                             | 75                | 0.0 (0.0, 0.0)               | 7.1 (0.0, 17.6)   | 0.0 (19.9, 0.0)  | 12.8 (0.0, 14.6)               | 80.1 (80.1, 67.8)    | 0.0 (0.0, 0.0)                     | 0.0 (0.0, 0.0)            | 0.0 (0.0, 0.0)          | - (-, -)                  |
| Australia                         | 66305             | 0.8 (0.8, 0.8)               | 34.4 (34.3, 33.1) | 0.0 (0.0, 0.0)   | 1.9 (1.6, 4.1)                 | 63.0 (63.3, 61.9)    | 26.3 (23.9, 35.9)                  | 13.1 (12.9, 13.4)         | 39.4 (36.8, 49.3)       | 2.3 (2.1, 2.9)            |
| Bahamas                           | 11214             | 0.0 (0.0, 0.0)               | 35.1 (31.5, 38.3) | 2.2 (5.1, 0.1)   | 0.0 (0.0, 0.5)                 | 62.8 (63.3, 61.1)    | 1.0 (1.0, 1.2)                     | 0.2 (0.1, 0.3)            | 1.2 (1.1, 1.4)          | 8.2 (7.7, 10.1)           |
| Bahrain                           | 497               | 7.4 (7.4, 7.4)               | 24.6 (36.0, 20.5) | 0.0 (9.0, 0.0)   | 0.0 (9.0, 0.0)                 | 27.1 (27.1, 24.4)    | 1.2 (0.9, 1.6)                     | 0.4 (0.3, 0.3)            | 1.6 (1.2, 1.9)          | 3.6 (2.8, 4.5)            |
| Bangladesh                        | 12203             | 59.4 (59.5, 58.6)            | 26.5 (27.0, 28.3) | 0.0 (0.0, 0.0)   | 1.4 (0.8, 1.0)                 | 12.7 (12.7, 12.1)    | 154.4 (162.4, 177.1)               | 106.1 (110.0, 118.3)      | 260.5 (272.4, 295.3)    | 59.6 (62.3, 67.5)         |
| Barbados                          | 96                | 0.0 (0.0, 0.0)               | 3.3 (0.0, 3.3)    | 0.0 (0.0, 0.0)   | 0.0 (0.0, 0.0)                 | 96.7 (100.0, 96.7)   | 0.0 (0.0, 0.0)                     | 0.0 (0.0, 0.0)            | 0.0 (0.0, 0.0)          | 0.0 (0.0, 0.0)            |
| Belgium                           | 344               | 96.4 (96.4, 96.4)            | 0.7 (0.7, 0.7)    | 0.0 (0.0, 0.0)   | 0.0 (0.0, 0.1)                 | 2.8 (2.8, 2.8)       | 26.4 (25.8, 26.9)                  | 649.3 (652.0, 641.5)      | 675.7 (677.8, 668.4)    | 106.9 (107.2, 105.7)      |
| Belize                            | 1761              | 0.0 (9.7, 9.7)               | 57.9 (57.9, 51.8) | 0.0 (0.0, 0.0)   | 17.1 (7.4, 13.5)               | 25.0 (25.0, 25.0)    | 3.6 (4.1, 5.2)                     | 1.9 (1.2, 0.9)            | 5.5 (5.2, 6.1)          | 166.8 (159.5, 186.8)      |
| Benin                             | 259               | 12.6 (12.6, 12.6)            | 5.5 (34.0, 5.5)   | 0.0 (0.0, 0.0)   | 43.5 (15.1, 44.5)              | 38.3 (38.3, 37.4)    | 1.3 (1.2, 1.6)                     | 1.1 (1.1, 1.1)            | 2.4 (2.3, 2.7)          | 12.2 (11.7, 13.5)         |
| Bonaire, Saba and Saint Eustatius | 183               | 0.0 (0.0, 0.0)               | 0.0 (0.0, 0.0)    | 0.0 (0.0, 0.0)   | 0.0 (0.0, 0.0)                 | 100.0 (100.0, 100.0) | 0.0 (0.0, 0.0)                     | 0.0 (0.0, 0.0)            | 0.0 (0.0, 0.0)          | - (-, -)                  |
| Brazil                            | 50400             | 0.9 (0.9, 0.9)               | 60.0 (59.7, 59.2) | 0.1 (0.7, 0.1)   | 2.3 (1.1, 4.5)                 | 36.7 (37.7, 35.3)    | 92.5 (86.6, 116.4)                 | 36.9 (36.4, 33.7)         | 129.4 (122.9, 150.1)    | 6.0 (5.7, 6.9)            |
| British Virgin Islands            | 297               | 0.0 (0.0, 0.0)               | 13.1 (0.0, 13.8)  | 0.7 (13.8, 0.0)  | 0.0 (0.0, 1.3)                 | 86.2 (86.2, 84.9)    | 0.0 (0.0, 0.0)                     | 0.0 (0.0, 0.0)            | 0.0 (0.0, 0.0)          | - (-, -)                  |
| Brunei                            | 392               | 8.4 (9.1, 9.1)               | 28.2 (45.9, 28.2) | 0.0 (0.0, 0.0)   | 33.9 (15.4, 33.4)              | 29.5 (29.5, 29.3)    | 1.0 (0.9, 1.2)                     | 0.7 (0.6, 0.5)            | 1.7 (1.4, 1.7)          | 11.0 (9.4, 11.3)          |
| Darussalam                        | 425               | 0.0 (0.0, 1.8)               | 0.0 (0.3, 11.6)   | 17.8 (17.0, 1.1) | 0.2 (0.0, 3.4)                 | 82.1 (82.7, 82.1)    | 0.0 (0.0, 0.0)                     | 0.1 (0.1, 0.1)            | 0.1 (0.1, 0.2)          | 0.1 (0.1, 0.1)            |
| Bulgaria                          | 1555              | 0.0 (0.0, 0.0)               | 43.9 (39.3, 44.4) | 0.0 (0.0, 0.0)   | 6.0 (5.5, 14.8)                | 50.1 (55.2, 40.8)    | 3.4 (3.1, 4.2)                     | 0.6 (0.7, 0.7)            | 4.0 (3.8, 4.8)          | 12.7 (12.0, 15.2)         |
| Cambodia                          | 1608              | 9.5 (9.5, 9.3)               | 71.6 (71.4, 73.0) | 0.0 (0.0, 0.0)   | 0.1 (0.1, 0.4)                 | 18.7 (18.9, 17.3)    | 3.0 (2.8, 3.2)                     | 5.6 (5.6, 6.9)            | 8.5 (8.4, 10.1)         | 17.8 (17.5, 21.1)         |
| Cameroun                          | 263064            | 0.1 (0.1, 0.1)               | 3.0 (2.9, 3.1)    | 1.6 (1.7, 1.6)   | 0.0 (0.0, 0.3)                 | 95.2 (95.2, 95.0)    | 12.5 (12.1, 15.3)                  | 4.4 (4.3, 4.6)            | 16.9 (16.4, 19.8)       | 0.8 (0.8, 0.9)            |
| Canada                            | 985               | 0.0 (0.0, 0.0)               | 0.9 (0.9, 0.2)    | 0.0 (0.0, 0.0)   | 0.0 (0.0, 0.7)                 | 99.1 (99.1, 99.1)    | 0.0 (0.0, 0.0)                     | 0.0 (0.0, 0.0)            | 0.0 (0.0, 0.0)          | 0.5 (0.4, 0.7)            |
| Cape Verde                        | 207               | 0.0 (0.0, 0.0)               | 39.8 (39.8, 48.0) | 1.2 (1.2, 0.0)   | 0.0 (0.0, 0.0)                 | 59.0 (59.0, 52.0)    | 0.1 (0.1, 0.1)                     | 0.0 (0.0, 0.0)            | 0.1 (0.1, 0.1)          | - (-, -)                  |
| Cayman Islands                    | 67226             | 0.0 (0.0, 0.0)               | 2.5 (2.4, 2.5)    | 0.0 (0.0, 0.0)   | 0.1 (0.0, 0.2)                 | 97.4 (97.5, 97.3)    | 1.9 (1.9, 2.2)                     | 0.4 (0.4, 0.4)            | 2.4 (2.2, 2.6)          | 0.7 (0.7, 0.8)            |
| Chile                             | 37872             | 27.3 (26.6, 27.8)            | 28.0 (31.8, 20.9) | 0.0 (0.0, 0.0)   | 4.4 (0.5, 11.8)                | 40.3 (41.0, 39.5)    | 587.4 (576.1, 688.4)               | 398.0 (404.7, 410.7)      | 985.4 (980.8, 1099.2)   | 5.5 (5.5, 6.2)            |
| China                             | 82                | 0.0 (0.0, 0.0)               | 28.5 (20.4, 28.5) | 0.0 (0.0, 0.0)   | 71.5 (79.6, 71.5)              | 0.0 (0.0, 0.0)       | 0.0 (0.0, 0.0)                     | 0.0 (0.0, 0.0)            | 0.0 (0.0, 0.0)          | - (-, -)                  |
| Cocos Islands                     | 7115              | 13.9 (13.9, 12.9)            | 51.1 (55.8, 49.4) | 0.0 (1.4, 0.0)   | 6.7 (0.5, 10.5)                | 28.3 (28.4, 27.1)    | 17.9 (16.7, 20.7)                  | 15.2 (14.8, 14.6)         | 33.1 (31.5, 35.3)       | 9.1 (8.7, 9.7)            |
| Colombia                          | 622               | 0.0 (0.0, 0.0)               | 0.2 (0.2, 0.7)    | 0.0 (0.0, 0.0)   | 0.2 (0.0, 0.2)                 | 99.6 (99.8, 99.1)    | 0.2 (0.0, 0.0)                     | 0.0 (0.0, 0.0)            | 0.0 (0.0, 0.0)          | 0.5 (0.4, 0.6)            |
| Comoros                           | 265               | 0.0 (0.0, 0.0)               | 50.7 (50.0, 45.3) | 0.0 (0.0, 0.0)   | 1.0 (0.0, 9.1)                 | 48.3 (50.0, 45.6)    | 0.1 (0.1, 0.1)                     | 0.0 (0.0, 0.0)            | 0.1 (0.1, 0.1)          | 0.6 (0.5, 0.9)            |
| Congo                             | 419               | 0.0 (0.0, 0.0)               | 55.7 (54.3, 55.7) | 0.0 (0.0, 0.0)   | 0.0 (0.0, 0.0)                 | 44.3 (45.7, 44.3)    | 0.0 (0.0, 0.0)                     | 0.0 (0.0, 0.0)            | 0.1 (0.1, 0.1)          | 0.1 (0.1, 0.1)            |
| Congo, Democratic Republic        | 466               | 0.0 (0.0, 0.0)               | 0.4 (0.4, 0.0)    | 0.0 (0.0, 0.0)   | 0.0 (0.0, 0.4)                 | 99.6 (99.6, 99.6)    | 0.0 (0.0, 0.0)                     | 0.0 (0.0, 0.0)            | 0.0 (0.0, 0.0)          | - (-, -)                  |
| Cook Islands                      | 1942              | 2.7 (2.7, 2.7)               | 28.7 (20.1, 31.6) | 0.0 (8.8, 0.0)   | 2.9 (0.3, 5.8)                 | 65.7 (68.2, 59.9)    | 1.6 (1.4, 1.9)                     | 2.5 (2.6, 2.5)            | 4.1 (4.0, 4.4)          | 4.7 (4.6, 5.1)            |
| Costa Rica                        | 1534              | 2.5 (2.5, 2.5)               | 29.5 (34.7, 25.4) | 0.0 (0.0, 0.0)   | 15.8 (8.9, 21.0)               | 52.2 (53.9, 51.1)    | 1.8 (1.6, 2.1)                     | 0.5 (0.4, 0.4)            | 2.2 (2.0, 2.5)          | 2.8 (2.5, 3.2)            |
| Cote de Ivoire                    | 4833              | 1.0 (1.0, 1.1)               | 1.9 (2.2, 1.8)    | 0.0 (0.0, 0.0)   | 0.7 (0.3, 0.8)                 | 96.4 (96.5, 96.4)    | 0.3 (0.3, 0.4)                     | 0.2 (0.2, 0.2)            | 0.6 (0.5, 0.6)          | 0.7 (0.6, 0.8)            |
| Croatia                           | 13738             | 0.6 (0.6, 0.4)               | 41.9 (28.1, 40.4) | 0.6 (14.1, 0.0)  | 0.5 (0.4, 4.3)                 | 56.4 (56.8, 54.9)    | 4.8 (4.2, 6.6)                     | 2.0 (2.1, 2.3)            | 6.8 (6.3, 8.9)          | - (-, -)                  |
| Cuba                              | 182               | 0.0 (0.0, 0.0)               | 0.0 (0.0, 0.0)    | 0.0 (0.0, 0.0)   | 0.0 (0.0, 0.0)                 | 100.0 (100.0, 100.0) | 0.0 (0.0, 0.0)                     | 0.0 (0.0, 0.0)            | 0.0 (0.0, 0.0)          | NaN (NaN, -)              |
| Curacao                           | 619               | 3.4 (3.4, 3.4)               | 3.4 (0.0, 4.5)    | 1.3 (5.5, 0.0)   | 1.1 (0.3, 2.6)                 | 90.8 (90.8, 89.5)    | 0.0 (0.0, 0.1)                     | 0.1 (0.1, 0.1)            | 0.1 (0.1, 0.2)          | 0.4 (0.3, 0.5)            |
| Cyprus                            | 6075              | 8.7 (8.7, 8.9)               | 50.5 (53.3, 47.2) | 0.0 (0.3, 0.0)   | 4.1 (0.8, 8.1)                 | 36.8 (37.0, 35.8)    | 25.8 (24.2, 29.9)                  | 4.3 (4.2, 3.9)            | 30.1 (28.5, 33.8)       | 7.5 (7.0, 8.4)            |
| Denmark                           | 416               | 0.7 (0.7, 0.7)               | 33.4 (38.1, 34.9) | 0.0 (0.0, 0.0)   | 10.7 (6.1, 10.3)               | 55.2 (55.2, 54.2)    | 0.1 (0.1, 0.2)                     | 0.0 (0.0, 0.0)            | 0.2 (0.1, 0.2)          | 4.2 (3.7, 5.6)            |
| Djibouti                          | 146               | 0.0 (0.0, 0.0)               | 0.0 (0.0, 0.0)    | 0.0 (0.3, 0.0)   | 0.3 (0.0, 0.3)                 | 99.7 (99.7, 99.7)    | 0.3 (0.0, 0.0)                     | 0.0 (0.0, 0.0)            | 0.1 (0.0, 0.0)          | 0.1 (0.0, 0.2)            |
| Dominica                          | 1529              | 1.6 (1.3, 1.3)               | 13.3 (2.5, 18.2)  | 2.7 (15.7, 0.6)  | 2.7 (0.0, 3.5)                 | 79.7 (80.5, 76.4)    | 0.3 (0.2, 0.4)                     | 0.1 (0.1, 0.2)            | 0.4 (0.4, 0.5)          | 0.3 (0.3, 0.4)            |
| Dominican Republic                | 750               | 0.0 (0.0, 0.0)               | 12.0 (10.2, 18.2) | 0.0 (0.0, 0.0)   | 3.4 (3.9, 4.3)                 | 84.6 (85.9, 77.5)    | 0.0 (0.0, 0.0)                     | 0.0 (0.0, 0.0)            | 0.0 (0.0, 0.0)          | 1.6 (1.6, 2.0)            |
| East Timor                        | 7395              | 0.9 (0.9, 0.9)               | 46.5 (54.6, 40.4) | 0.0 (0.0, 0.0)   | 16.6 (8.4, 22.9)               | 36.0 (36.1, 35.8)    | 11.3 (10.5, 13.0)                  | 5.7 (5.7, 5.6)            | 17.0 (16.2, 18.7)       | 14.3 (13.6, 15.7)         |
| Ecuador                           | 5264              | 27.1 (25.7, 26.9)            | 21.7 (7.9, 24.0)  | 0.2 (20.7, 0.0)  | 6.0 (0.4, 5.9)                 | 45.0 (45.3, 43.2)    | 5.7 (5.0, 6.7)                     | 277.1 (258.3, 258.3)      | 282.8 (263.3, 265.1)    | 71.4 (66.5, 66.9)         |
| Egypt                             | 742               | 0.0 (0.0, 0.0)               | 57.7 (60.0, 58.2) | 0.0 (0.0, 0.0)   | 12.6 (10.3, 12.6)              | 29.7 (29.7, 29.2)    | 2.1 (1.8, 2.1)                     | 1.1 (1.2, 1.1)            | 3.0 (2.9, 3.2)          | 8.8 (8.6, 9.5)            |
| El Salvador                       | 657               | 3.3 (3.3, 3.3)               | 13.6 (13.9, 13.7) | 0.0 (0.0, 0.0)   | 9.0 (9.0, 9.5)                 | 74.1 (73.8, 73.5)    | 0.7 (0.6, 0.8)                     | 1.0 (1.0, 1.1)            | 1.7 (1.6, 1.8)          | 14.0 (13.4, 15.0)         |
| Equatorial Guinea                 | 2924              | 0.0 (0.0, 0.0)               | 34.0 (28.0, 36.3) | 0.2 (5.1, 0.0)   | 1.7 (1.7, 1.9)                 | 64.1 (65.2, 61.8)    | 0.1 (0.1, 0.2)                     | 0.0 (0.0, 0.0)            | 0.2 (0.1, 0.2)          | - (-, -)                  |
| Eritrea                           | 2365              | 0.3 (0.3, 0.3)               | 74.2 (73.0, 72.3) | 0.2 (0.3, 0.6)   | 0.0 (0.0, 3.7)                 | 25.3 (26.4, 23.7)    | 3.7 (3.6, 4.2)                     | 0.3 (0.2, 0.2)            | 3.9 (3.8, 4.4)          | 9.7 (9.2, 10.9)           |
| Estonia                           | 6017              | 0.0 (0.0, 0.0)               | 0.3 (0.2, 0.3)    | 0.0 (0.0, 0.0)   | 0.0 (0.0, 0.0)                 | 99.7 (99.8, 99.7)    | 0.0 (0.0, 0.0)                     | 0.0 (0.0, 0.0)            | 0.0 (0.0, 0.0)          | - (-, -)                  |
| Falkland Islands                  | 924               | 0.1 (0.1, 0.1)               | 0.6 (0.6, 0.6)    | 0.0 (0.0, 0.0)   | 0.1 (0.1, 0.1)                 | 99.2 (99.3, 99.2)    | 0.0 (0.0, 0.0)                     | 0.0 (0.0, 0.0)            | 0.0 (0.0, 0.0)          | - (-, -)                  |
| Faroe Islands                     | 4179              | 0.0 (0.0, 0.0)               | 12.5 (12.8, 10.0) | 0.0 (0.0, 0.0)   | 1.8 (0.1, 6.9)                 | 85.7 (87.1, 83.2)    | 0.8 (0.7, 1.0)                     | 0.1 (0.1, 0.2)            | 0.9 (0.8, 1.2)          | 16.8 (14.7, 21.5)         |
| Fiji                              | 15175             | 0.6 (0.6, 0.8)               | 31.2 (30.7, 31.9) | 0.3 (0.6, 0.0)   | 0.4 (0.2, 1.3)                 | 67.5 (67.9, 66.0)    | 7.2 (7.1, 8.2)                     | 2.7 (2.6, 3.0)            | 8.1 (7.9, 8.9)          | 2.7 (2.6, 3.0)            |
| France                            | 8928              | 21.4 (21.9, 22.5)            | 18.1 (17.3, 12.6) | 0.0 (1.5, 0.0)   | 4.0 (2.7, 9.1)                 | 56.4 (56.6, 55.8)    | 43.7 (41.9, 49.0)                  | 39.5 (38.9, 37.9)         | 83.2 (80.8, 86.8)       | 2.7 (2.7, 2.9)            |
| French Guiana                     | 1022              | 0.0 (0.0, 0.0)               | 74.5 (74.5, 28.2) | 0.0 (0.0, 0.0)   | 0.0 (0.0, 0.0)                 | 25.5 (25.5, 24.7)    | 0.6 (0.5, 1.2)                     | 0.2 (0.2, 0.2)            | 0.8 (0.7, 1.4)          | - (-, -)                  |
| French Polynesia                  | 5479              | 0.0 (0.0, 0.0)               | 0.0 (0.0, 0.0)    | 0.0 (0.0, 0.0)   | 0.0 (0.0, 0.0)                 | 100.0 (100.0, 100.0) | 0.0 (0.0, 0.0)                     | 0.0 (0.0, 0.0)            | 0.0 (0.0, 0.0)          | - (-, -)                  |
| French Southern Territories       | 393               | 0.0 (0.0, 0.0)               | 0.0 (0.0, 0.0)    | 0.0 (0.0, 0.0)   | 0.0 (0.0, 0.0)                 | 100.0 (100.0, 100.0) | 0.0 (0.0, 0.0)                     | 0.0 (0.0, 0.0)            | 0.0 (0.0, 0.0)          | NaN (NaN, NaN)            |
| Gabon                             | 2213              | 0.0 (0.0, 0.0)               | 63.0 (60.8, 33.4) | 0.0 (0.0, 0.0)   | 10.0 (10.0, 40.0)              | 27.0 (29.2, 26.6)    | 3.9 (3.7, 6.1)                     | 4.0 (3.5, 3.7)            | 7.9 (7.2, 9.8)          | 38.5 (35.0, 47.9)         |
| Gambia                            | 1173              | 0.0 (0.0, 0.5)               | 86.1 (91.7, 85.8) | 0.0 (0.0, 0.0)   | 6.5 (0.6, 6.3)                 | 7.4 (7.7, 7.4)       | 0.3 (0.3, 0.4)                     | 0.1 (0.1, 0.1)            | 0.4 (0.4, 0.5)          | 19.0 (16.6, 23.3)         |
| Georgia                           | 397               | 0.0 (0.0, 2.3)               | 42.3 (38.6, 35.1) | 20.5 (23.5, 3.0) | 0.0 (0.0, 22.7)                | 37.1 (37.9, 36.8)    | 0.3 (0.2, 0.4)                     | 0.1 (0.0, 0.1)            | 0.3 (0.3, 0.5)          | 1.0 (0.9, 1.5)            |
| Germany                           | 4104              | 41.2 (41.5, 45.2)            | 35.1 (37.5, 26.4) | 0.0 (0.0, 0.0)   | 3.7 (0.5, 8.5)                 | 20.1 (20.6, 19.9)    | 67.4 (65.5, 74.5)                  | 31.0 (31.0, 30.2)         | 98.4 (96.6, 104.7)      | 2.2 (2.2, 2.3)            |
| Ghana                             | 1010              | 0.3 (0.3, 0.4)               | 9.5 (45.3, 7.4)   | 0.0 (0.0, 0.0)   | 47.7 (11.0, 50.1)              | 42.5 (43.4, 42.2)    | 3.0 (2.6, 3.7)                     | 3.0 (3.2, 4.4)            | 3.7 (3.2, 4.4)          | 4.9 (4.1, 5.7)            |
| Gibraltar                         | 15                | 0.0 (32.4, 32.4)             | 0.0 (0.0, 0.0)    | 0.0 (0.0, 0.0)   | 32.4 (0.0, 0.0)                | 67.6 (67.6, 67.6)    | 0.1 (0.0, 0.1)                     | 0.0 (0.0, 0.0)            | 0.1 (0.0, 0.1)          | - (-, -)                  |

Continued on next page

Table S1 continued

| Country                            | Coast length (km) | Protect at the coastline (%) | Retreat (%)       | Accommodate (%)  | Retreat and protect inland (%) | Do nothing (%)       | Adaptation investments (bil. US\$) | Flood damages (bil. US\$) | Total costs (bil. US\$) | Relative costs (% of GDP) |
|------------------------------------|-------------------|------------------------------|-------------------|------------------|--------------------------------|----------------------|------------------------------------|---------------------------|-------------------------|---------------------------|
| Greece                             | 13553             | 4.4 (2.7, 4.7)               | 5.9 (3.5, 4.9)    | 0.5 (5.4, 0.0)   | 1.4 (0.5, 3.0)                 | 87.8 (87.8, 87.3)    | 1.4 (0.8, 2.6)                     | 4.8 (4.8, 4.8)            | 6.1 (5.6, 7.4)          | 2.6 (2.3, 3.1)            |
| Greenland                          | 62417             | 0.0 (0.0, 0.0)               | 0.1 (0.1, 0.1)    | 0.0 (0.0, 0.0)   | 0.0 (0.0, 0.0)                 | 99.9 (99.9, 99.9)    | 0.2 (0.2, 0.2)                     | 0.0 (0.0, 0.0)            | 0.3 (0.3, 0.3)          | - (-, -)                  |
| Grenada                            | 192               | 0.4 (0.4, 0.4)               | 0.9 (0.6, 0.8)    | 0.0 (0.3, 0.0)   | 0.0 (0.0, 0.3)                 | 98.6 (98.6, 98.4)    | 0.0 (0.0, 0.0)                     | 0.0 (0.0, 0.0)            | 0.0 (0.0, 0.0)          | 0.7 (0.6, 0.9)            |
| Guadeloupe                         | 430               | 0.0 (0.0, 0.0)               | 2.0 (0.0, 12.7)   | 11.3 (13.0, 0.3) | 0.0 (0.0, 1.8)                 | 86.7 (87.0, 85.2)    | 0.0 (0.0, 0.0)                     | 0.0 (0.0, 0.0)            | 0.0 (0.0, 0.0)          | - (-, -)                  |
| Guatemala                          | 514               | 6.1 (6.1, 6.1)               | 28.9 (34.0, 28.9) | 0.0 (0.0, 0.0)   | 47.4 (41.4, 47.4)              | 17.5 (18.4, 17.5)    | 2.8 (2.5, 3.1)                     | 2.5 (2.5, 2.5)            | 5.2 (5.0, 5.7)          | 5.1 (4.9, 5.5)            |
| Guernsey                           | 96                | 17.5 (17.5, 17.5)            | 5.0 (5.0, 1.5)    | 0.0 (0.0, 0.0)   | 5.7 (5.7, 9.2)                 | 71.8 (71.8, 71.8)    | 0.7 (0.7, 0.8)                     | 0.1 (0.1, 0.1)            | 0.8 (0.8, 0.9)          | - (-, -)                  |
| Guinea                             | 2728              | 0.0 (0.0, 0.0)               | 93.0 (93.0, 92.4) | 0.0 (0.0, 0.0)   | 0.1 (0.1, 0.7)                 | 6.9 (6.9, 6.9)       | 5.8 (5.7, 6.0)                     | 1.0 (1.1, 1.2)            | 6.9 (6.8, 7.2)          | 29.1 (28.7, 30.6)         |
| Guinea-Bissau                      | 4552              | 0.0 (0.0, 0.0)               | 77.2 (76.0, 78.0) | 0.0 (0.0, 0.0)   | 0.3 (0.5, 0.7)                 | 22.5 (23.5, 21.3)    | 0.7 (0.6, 0.8)                     | 0.4 (0.4, 0.6)            | 1.1 (1.0, 1.4)          | 55.2 (51.3, 70.3)         |
| Guyana                             | 1693              | 25.3 (25.3, 25.3)            | 48.3 (48.3, 49.8) | 0.0 (0.0, 0.0)   | 0.2 (0.0, 0.2)                 | 26.2 (26.4, 24.7)    | 17.7 (17.1, 18.8)                  | 42.9 (43.6, 42.1)         | 60.6 (60.7, 60.9)       | 361.1 (361.8, 363.1)      |
| Haiti                              | 1832              | 0.4 (0.4, 0.4)               | 11.7 (13.1, 14.1) | 0.6 (1.4, 0.0)   | 13.2 (9.6, 13.6)               | 74.2 (75.4, 71.9)    | 0.9 (0.7, 1.1)                     | 0.1 (0.1, 0.1)            | 1.0 (0.8, 1.2)          | 4.8 (4.0, 6.2)            |
| Honduras                           | 2017              | 0.0 (0.0, 0.0)               | 71.2 (72.8, 67.8) | 0.0 (0.5, 0.0)   | 6.8 (4.3, 10.9)                | 22.0 (22.4, 21.2)    | 3.1 (2.8, 3.6)                     | 0.5 (0.5, 0.8)            | 3.6 (3.3, 4.3)          | 10.6 (9.6, 12.6)          |
| Hong Kong, China SAR               | 749               | 8.4 (8.2, 8.4)               | 2.5 (3.0, 2.8)    | 0.0 (0.0, 0.0)   | 0.8 (0.2, 1.3)                 | 88.4 (88.7, 87.5)    | 1.5 (1.3, 1.7)                     | 1.0 (1.0, 1.0)            | 2.5 (2.3, 2.7)          | 0.6 (0.6, 0.7)            |
| Iceland                            | 6585              | 0.1 (0.1, 0.1)               | 19.1 (19.2, 19.1) | 0.1 (0.1, 0.1)   | 0.1 (0.0, 0.4)                 | 80.5 (80.6, 80.3)    | 1.3 (1.3, 1.5)                     | 2.3 (2.3, 2.2)            | 3.6 (3.6, 3.7)          | 11.8 (11.5, 11.9)         |
| India                              | 24683             | 16.2 (16.2, 15.8)            | 30.0 (33.6, 29.8) | 0.0 (0.1, 0.0)   | 20.7 (15.9, 23.1)              | 33.1 (34.2, 31.3)    | 258.4 (269.7, 337.6)               | 168.1 (165.4, 178.1)      | 426.5 (435.1, 515.7)    | 12.0 (12.3, 14.5)         |
| Indonesia                          | 110544            | 16.2 (16.3, 16.4)            | 24.8 (25.9, 23.7) | 0.0 (0.0, 0.0)   | 10.3 (8.1, 13.0)               | 48.7 (49.7, 46.9)    | 216.9 (207.1, 245.0)               | 147.4 (143.5, 137.5)      | 364.2 (350.6, 382.6)    | 26.6 (25.6, 27.9)         |
| Iran, Islamic Republic             | 5974              | 0.0 (0.0, 21.8)              | 32.4 (31.2, 22.5) | 0.0 (0.3, 0.0)   | 23.5 (23.5, 12.2)              | 44.1 (45.0, 43.5)    | 16.1 (13.0, 19.6)                  | 2.5 (3.2, 3.1)            | 18.6 (16.3, 22.7)       | 4.6 (4.0, 5.9)            |
| Iraq                               | 929               | 92.0 (92.0, 92.0)            | 3.9 (3.4, 5.0)    | 0.0 (0.0, 0.0)   | 0.2 (0.0, 0.0)                 | 3.9 (4.6, 3.0)       | 29.6 (27.7, 31.8)                  | 6.3 (7.4, 7.2)            | 36.0 (35.1, 39.0)       | 14.3 (14.0, 15.5)         |
| Ireland                            | 5873              | 2.8 (2.8, 2.8)               | 30.6 (30.4, 30.0) | 0.0 (0.0, 0.0)   | 0.8 (0.6, 2.2)                 | 65.8 (66.2, 65.0)    | 14.7 (14.2, 15.9)                  | 1.3 (1.4, 1.3)            | 16.0 (15.5, 17.2)       | 2.9 (2.8, 3.1)            |
| Isle of Man                        | 144               | 3.7 (3.7, 3.7)               | 16.5 (16.5, 16.5) | 0.0 (0.0, 0.0)   | 0.0 (0.0, 0.0)                 | 79.8 (79.8, 79.8)    | 0.2 (0.2, 0.2)                     | 0.0 (0.0, 0.0)            | 0.2 (0.2, 0.3)          | - (-, -)                  |
| Israel                             | 211               | 1.8 (1.0, 1.8)               | 2.5 (0.0, 2.3)    | 0.0 (6.8, 0.0)   | 3.8 (0.2, 7.2)                 | 91.9 (91.9, 88.7)    | 0.0 (0.0, 0.0)                     | 0.0 (0.0, 0.0)            | 0.0 (0.0, 0.0)          | 0.0 (0.0, 0.0)            |
| Italy                              | 8313              | 19.0 (19.0, 19.7)            | 12.0 (5.3, 10.7)  | 0.4 (8.2, 0.0)   | 2.2 (1.0, 4.1)                 | 66.5 (66.6, 65.5)    | 20.0 (19.0, 23.2)                  | 17.7 (17.0, 16.8)         | 37.7 (36.0, 39.9)       | 1.7 (1.6, 1.8)            |
| Jamaica                            | 836               | 0.0 (0.0, 0.0)               | 29.0 (2.7, 29.0)  | 0.2 (28.3, 1.3)  | 2.2 (0.0, 2.3)                 | 68.6 (69.0, 67.5)    | 0.4 (0.2, 0.6)                     | 0.1 (0.2, 0.1)            | 0.5 (0.4, 0.7)          | 2.7 (2.3, 3.7)            |
| Japan                              | 28539             | 13.7 (13.9, 14.3)            | 9.7 (8.8, 6.1)    | 0.0 (0.3, 0.0)   | 1.5 (1.1, 6.2)                 | 75.1 (75.9, 73.4)    | 147.6 (143.6, 179.3)               | 104.0 (103.5, 103.6)      | 251.6 (247.1, 283.0)    | 6.0 (5.9, 6.7)            |
| Jersey                             | 71                | 12.4 (12.4, 12.4)            | 11.6 (15.7, 8.2)  | 0.0 (0.0, 0.0)   | 4.1 (0.0, 7.5)                 | 71.9 (71.9, 71.9)    | 0.5 (0.5, 0.5)                     | 0.1 (0.1, 0.0)            | 0.5 (0.5, 0.6)          | - (-, -)                  |
| Jordan                             | 25                | 9.3 (9.3, 9.3)               | 0.0 (0.0, 4.9)    | 0.0 (0.0, 0.0)   | 0.0 (0.0, 5.7)                 | 90.7 (90.7, 80.1)    | 0.0 (0.0, 0.0)                     | 0.1 (0.1, 0.1)            | 0.1 (0.1, 0.1)          | 0.1 (0.1, 0.1)            |
| Kenya                              | 1488              | 0.0 (0.0, 0.0)               | 69.5 (71.3, 68.0) | 0.0 (0.0, 0.0)   | 2.2 (0.1, 4.3)                 | 28.3 (28.6, 27.7)    | 2.8 (2.7, 3.1)                     | 0.6 (0.5, 0.6)            | 3.4 (3.2, 3.6)          | 3.1 (3.0, 3.4)            |
| Kiribati                           | 1763              | 0.0 (0.0, 0.0)               | 8.5 (8.4, 6.9)    | 0.0 (0.0, 0.0)   | 0.0 (0.0, 2.0)                 | 91.5 (91.6, 91.1)    | 0.1 (0.1, 0.1)                     | 0.0 (0.0, 0.0)            | 0.1 (0.1, 0.1)          | 32.0 (30.4, 39.0)         |
| Korea, Democratic Peoples Republic | 4268              | 0.0 (0.4, 0.6)               | 45.4 (44.7, 38.0) | 0.0 (0.1, 0.0)   | 0.9 (0.3, 9.3)                 | 53.6 (54.5, 52.0)    | 6.5 (6.1, 7.7)                     | 0.6 (0.5, 0.9)            | 7.1 (6.7, 8.6)          | - (-, -)                  |
| Korea, Republic                    | 10783             | 3.1 (3.1, 3.3)               | 31.4 (33.4, 29.6) | 0.1 (0.3, 0.0)   | 2.8 (0.1, 5.2)                 | 62.7 (63.0, 61.9)    | 132.5 (126.7, 146.8)               | 18.7 (19.0, 22.1)         | 151.2 (145.8, 168.9)    | 8.8 (8.5, 9.9)            |
| Kuwait                             | 736               | 1.5 (0.1, 1.5)               | 59.8 (61.2, 57.1) | 0.0 (0.0, 0.0)   | 11.0 (9.6, 15.5)               | 27.7 (29.1, 25.9)    | 1.1 (1.0, 1.6)                     | 0.4 (0.4, 0.4)            | 1.6 (1.4, 2.0)          | 1.0 (0.9, 1.2)            |
| Latvia                             | 671               | 26.1 (26.1, 26.1)            | 24.8 (25.6, 19.1) | 0.0 (0.0, 0.0)   | 47.2 (48.3, 45.6)              | 4.9 (0.0, 9.2)       | 4.2 (3.9, 4.5)                     | 0.9 (0.9, 0.7)            | 5.0 (4.8, 5.6)          | 11.6 (10.9, 12.8)         |
| Lebanon                            | 244               | 6.2 (2.0, 6.2)               | 1.0 (0.0, 3.1)    | 1.9 (7.9, 0.0)   | 0.8 (0.0, 1.2)                 | 90.1 (90.1, 89.5)    | 0.0 (0.0, 0.0)                     | 0.0 (0.0, 0.0)            | 0.0 (0.0, 0.0)          | - (-, -)                  |
| Liberia                            | 905               | 4.2 (4.2, 4.2)               | 39.5 (39.6, 41.5) | 0.0 (0.0, 0.0)   | 5.7 (5.0, 7.6)                 | 50.6 (51.1, 46.6)    | 0.7 (0.7, 0.8)                     | 0.3 (0.3, 0.3)            | 1.0 (0.9, 1.1)          | 22.6 (21.2, 25.1)         |
| Libya                              | 1932              | 17.5 (9.8, 17.3)             | 23.6 (0.0, 21.5)  | 1.4 (38.9, 0.6)  | 6.9 (0.0, 10.3)                | 50.6 (51.3, 50.2)    | 1.8 (1.2, 2.8)                     | 2.5 (2.4, 2.5)            | 4.4 (3.6, 5.2)          | 8.6 (7.2, 10.4)           |
| Lithuania                          | 232               | 2.6 (1.3, 2.6)               | 27.9 (55.0, 23.2) | 0.0 (0.0, 0.0)   | 25.8 (0.0, 30.5)               | 43.7 (43.7, 43.7)    | 1.2 (1.1, 1.4)                     | 0.3 (0.2, 0.2)            | 1.3 (1.3, 1.6)          | 1.9 (1.7, 2.1)            |
| Macau                              | 48                | 45.6 (45.6, 45.6)            | 0.0 (0.0, 0.0)    | 0.0 (0.0, 0.0)   | 2.9 (2.9, 2.9)                 | 51.6 (51.6, 51.6)    | 0.5 (0.4, 0.5)                     | 0.2 (0.2, 0.2)            | 0.6 (0.6, 0.7)          | 1.3 (1.2, 1.4)            |
| Madagascar                         | 10538             | 0.0 (0.0, 0.0)               | 51.9 (52.3, 54.5) | 0.0 (0.1, 0.0)   | 3.9 (1.4, 3.6)                 | 44.2 (46.2, 41.9)    | 5.2 (4.8, 6.2)                     | 0.9 (0.8, 0.7)            | 6.1 (5.6, 6.9)          | 38.3 (35.2, 43.1)         |
| Malaysia                           | 13599             | 16.7 (11.8, 17.4)            | 26.5 (35.1, 20.3) | 0.0 (0.0, 0.0)   | 32.5 (23.2, 38.8)              | 24.4 (29.9, 23.5)    | 88.6 (81.9, 101.5)                 | 34.5 (31.6, 30.5)         | 123.2 (113.5, 132.0)    | 30.8 (28.4, 33.0)         |
| Maldives                           | 1340              | 0.2 (0.4, 0.4)               | 5.9 (4.6, 6.6)    | 0.0 (0.1, 0.0)   | 12.2 (8.5, 23.6)               | 81.7 (86.4, 69.4)    | 0.5 (0.3, 0.8)                     | 0.2 (0.2, 0.2)            | 0.7 (0.5, 1.0)          | 10.2 (7.5, 15.4)          |
| Malta                              | 170               | 0.0 (0.0, 0.0)               | 0.3 (0.0, 1.1)    | 0.3 (0.6, 0.0)   | 0.0 (0.0, 0.8)                 | 99.4 (99.4, 98.1)    | 0.0 (0.0, 0.0)                     | 0.0 (0.0, 0.0)            | 0.0 (0.0, 0.0)          | 0.0 (0.0, 0.0)            |
| Marshall Islands                   | 1929              | 0.0 (0.0, 0.0)               | 4.0 (2.6, 6.1)    | 0.0 (0.0, 0.0)   | 0.9 (0.0, 0.4)                 | 95.1 (97.4, 93.6)    | 0.0 (0.0, 0.0)                     | 0.0 (0.0, 0.0)            | 0.0 (0.0, 0.0)          | 11.3 (8.7, 14.7)          |
| Martinique                         | 332               | 0.0 (0.0, 0.0)               | 5.5 (0.7, 8.4)    | 4.4 (9.2, 0.0)   | 0.0 (0.0, 1.7)                 | 90.1 (90.1, 90.0)    | 0.0 (0.0, 0.0)                     | 0.0 (0.0, 0.0)            | 0.0 (0.0, 0.0)          | - (-, -)                  |
| Mauritania                         | 1320              | 2.4 (2.4, 2.4)               | 52.3 (78.6, 52.4) | 0.0 (0.0, 0.0)   | 26.7 (0.0, 26.8)               | 18.7 (19.0, 18.4)    | 1.9 (1.4, 2.3)                     | 4.4 (4.4, 4.4)            | 6.3 (5.8, 6.7)          | 59.9 (55.2, 64.1)         |
| Mauritius                          | 358               | 0.0 (0.0, 0.0)               | 0.0 (0.0, 0.0)    | 0.0 (0.0, 0.0)   | 0.0 (0.0, 0.0)                 | 100.0 (100.0, 100.0) | 0.0 (0.0, 0.0)                     | 0.0 (0.0, 0.0)            | 0.0 (0.0, 0.0)          | 0.0 (0.0, 0.0)            |
| Mayotte                            | 212               | 0.0 (0.0, 0.0)               | 0.0 (0.0, 0.0)    | 0.0 (0.0, 0.0)   | 0.0 (0.0, 0.0)                 | 100.0 (100.0, 100.0) | 0.0 (0.0, 0.0)                     | 0.0 (0.0, 0.0)            | 0.0 (0.0, 0.0)          | NaN (NaN, -)              |
| Mexico                             | 23226             | 4.4 (4.4, 4.4)               | 44.5 (46.0, 42.6) | 0.1 (0.3, 0.0)   | 4.9 (2.5, 7.5)                 | 46.1 (46.9, 45.5)    | 43.3 (36.2, 53.7)                  | 45.9 (48.4, 48.3)         | 89.1 (84.6, 102.0)      | 5.0 (4.7, 5.7)            |
| Micronesia, Federal State of       | 1149              | 0.0 (0.0, 0.0)               | 4.7 (4.0, 6.8)    | 0.0 (0.0, 0.0)   | 0.5 (0.0, 0.9)                 | 94.8 (96.0, 92.3)    | 0.0 (0.0, 0.0)                     | 0.0 (0.0, 0.0)            | 0.0 (0.0, 0.1)          | 10.1 (9.7, 12.2)          |
| Monaco                             | 4                 | 20.9 (20.9, 20.9)            | 0.0 (0.0, 0.0)    | 0.0 (0.0, 0.0)   | 0.0 (0.0, 0.0)                 | 79.1 (79.1, 79.1)    | 0.0 (0.0, 0.0)                     | 0.0 (0.0, 0.0)            | 0.0 (0.0, 0.0)          | - (-, -)                  |
| Montenegro                         | 251               | 1.0 (1.0, 1.0)               | 13.9 (13.5, 12.2) | 0.5 (0.5, 0.5)   | 0.0 (0.4, 1.7)                 | 84.5 (84.5, 84.5)    | 0.0 (0.0, 0.0)                     | 0.0 (0.0, 0.0)            | 0.1 (0.0, 0.1)          | 0.8 (0.6, 1.2)            |
| Morocco                            | 3218              | 0.9 (0.9, 0.9)               | 17.5 (17.9, 15.4) | 0.0 (0.1, 0.0)   | 3.7 (2.1, 6.2)                 | 77.8 (78.9, 77.4)    | 2.0 (1.8, 2.3)                     | 0.3 (0.2, 0.3)            | 2.3 (2.1, 2.6)          | 1.6 (1.5, 1.8)            |
| Mozambique                         | 8099              | 0.2 (0.2, 0.2)               | 75.1 (74.6, 75.9) | 0.0 (0.0, 0.0)   | 1.3 (1.3, 1.4)                 | 23.5 (23.9, 22.6)    | 21.4 (20.8, 23.0)                  | 1.5 (1.5, 1.5)            | 22.9 (22.3, 24.4)       | 111.1 (108.1, 118.5)      |
| Myanmar                            | 22191             | 3.0 (3.0, 3.1)               | 54.6 (57.9, 52.5) | 0.0 (0.0, 0.0)   | 13.7 (10.3, 16.0)              | 28.7 (28.8, 28.3)    | 188.6 (187.1, 248.5)               | 60.6 (66.1, 46.0)         | 249.2 (253.2, 294.5)    | 384.4 (390.6, 454.4)      |
| Namibia                            | 1700              | 0.0 (0.0, 0.0)               | 22.0 (21.5, 23.6) | 0.0 (0.0, 0.0)   | 6.9 (6.9, 7.0)                 | 71.1 (71.6, 69.4)    | 1.7 (1.4, 1.9)                     | 0.4 (0.5, 0.6)            | 2.0 (1.9, 2.5)          | 16.3 (15.2, 20.5)         |
| Nauru                              | 17                | 0.0 (0.0, 0.0)               | 8.7 (8.7, 23.6)   | 0.0 (0.0, 0.0)   | 0.0 (0.0, 0.0)                 | 91.3 (91.3, 76.4)    | 0.0 (0.0, 0.0)                     | 0.0 (0.0, 0.0)            | 0.0 (0.0, 0.0)          | 0.4 (0.2, 1.1)            |
| Netherlands                        | 3893              | 79.0 (78.7, 78.7)            | 9.8 (10.3, 9.0)   | 0.0 (0.0, 0.0)   | 2.3 (2.1, 3.5)                 | 8.9 (8.9, 8.9)       | 132.8 (129.8, 139.1)               | 2531.8 (2540.1, 2530.8)   | 2664.6 (2670.0, 2669.9) | 238.3 (238.8, 238.8)      |
| New Caledonia                      | 3071              | 0.0 (0.0, 0.0)               | 8.7 (5.4, 15.0)   | 0.1 (0.2, 0.0)   | 0.0 (0.0, 0.0)                 | 91.1 (94.5, 85.0)    | 0.2 (0.2, 0.2)                     | 0.0 (0.0, 0.0)            | 0.2 (0.2, 0.2)          | - (-, -)                  |
| New Zealand                        | 15208             | 0.9 (0.9, 0.9)               | 12.5 (12.9, 9.3)  | 0.0 (0.0, 0.0)   | 2.4 (1.3, 6.4)                 | 84.2 (85.0, 83.4)    | 5.4 (5.1, 6.9)                     | 4.9 (4.7, 4.8)            | 10.3 (9.8, 11.7)        | 4.1 (3.9, 4.6)            |
| Nicaragua                          | 2377              | 0.0 (0.0, 0.0)               | 72.0 (73.2, 72.9) | 0.0 (3.1, 0.0)   | 4.8 (0.0, 4.9)                 | 23.1 (23.7, 22.2)    | 1.4 (1.3, 1.7)                     | 0.2 (0.3, 0.3)            | 1.7 (1.5, 1.9)          | 9.5 (8.6, 10.9)           |
| Nigeria                            | 7273              | 65.7 (65.7, 66.2)            | 16.5 (16.5, 15.4) | 0.0 (0.0, 0.0)   | 7.9 (7.8, 8.9)                 | 9.8 (10.0, 9.5)      | 112.5 (107.1, 126.5)               | 145.6 (143.6, 143.6)      | 258.1 (250.7, 270.1)    | 71.1 (69.1, 74.4)         |
| Norway                             | 44362             | 0.3 (0.3, 0.3)               | 6.4 (6.4, 6.0)    | 0.0 (0.0, 0.0)   | 0.5 (0.3, 1.3)                 | 92.8 (93.0, 92.4)    | 7.7 (7.2, 9.0)                     | 22.8 (23.0, 23.0)         | 30.5 (30.3, 31.9)       | 6.3 (6.2, 6.6)            |
| Oman                               | 2828              | 2.1 (2.1, 2.0)               | 21.1 (20.7, 21.6) | 0.0 (0.0, 0.0)   | 7.4 (6.1, 10.5)                | 69.3 (71.1, 65.8)    | 2.1 (1.8, 2.6)                     | 2.6 (2.2, 3.3)            | 2.4 (2.1, 3.1)          | 2.3 (2.1, 3.1)            |
| Pakistan                           | 8807              | 0.0 (0.0, 0.0)               | 52.0 (50.8, 26.5) | 0.0 (0.0, 0.0)   | 0.0 (0.0, 26.0)                | 48.0 (49.2, 47.5)    | 13.5 (8.1, 15.3)                   | 1.5 (4.6, 4.9)            | 15.0 (12.7, 20.1)       | 4.4 (3.8, 5.9)            |
| Palau                              | 565               | 0.0 (0.0, 0.0)               | 0.8 (0.8, 1.3)    | 0.0 (0.0, 0.0)   | 0.0 (0.0, 0.0)                 | 99.2 (99.2, 98.7)    | 0.0 (0.0, 0.0)                     | 0.0 (0.0, 0.0)            | 0.0 (0.0, 0.0)          | 1.3 (1.2, 1.9)            |
| Panama                             | 5524              | 1.6 (0.1, 1.6)               | 35.5 (27.5, 35.7) | 0.1 (10.6, 0.0)  | 3.5 (1.7, 4.5)                 | 59.3 (60.2, 58.2)    | 2.6 (2.1, 3.5)                     | 2.0 (2.1, 1.9)            | 4.6 (4.2, 5.4)          | 5.5 (5.0, 6.5)            |
| Papua New Guinea                   | 21053             | 0.0 (0.0, 0.0)               | 33.4 (31.7, 34.9) | 0.0 (0.1, 0.0)   | 0.3 (0.2, 1.7)                 | 66.2 (67.9, 63.4)    | 3.5 (3.2, 4.3)                     | 0.5 (0.5, 0.6)            | 4.1 (3.7, 4.9)          | 13.1 (12.1, 15.8)         |
| Peru                               | 3216              | 0.0 (0.0, 0.0)               | 18.0 (20.9, 19.4) | 0.0 (0.2, 0.0)   | 5.1 (1.4, 6.3)                 | 76.9 (77.5, 74.3)    | 0.9 (0.7, 1.1)                     | 0.7 (0.7, 0.7)            | 1.6 (1.5, 1.8)          | 0.6 (0.5, 0.7)            |
| Philippines                        | 32554             | 13.3 (13.5, 13.1)            | 10.1 (12.4, 9.4)  | 0.0 (0.0, 0.0)   | 17.2 (12.5, 20.6)              | 59.5 (61.6, 56.8)    | 52.                                |                           |                         |                           |

Table S1 continued

| Country                     | Coast length (km) | Protect at the coastline (%) | Retreat (%)       | Accommodate (%)  | Retreat and protect inland (%) | Do nothing (%)       | Adaptation investments (bil. US\$) | Flood damages (bil. US\$) | Total costs (bil. US\$)    | Relative costs (% of GDP) |
|-----------------------------|-------------------|------------------------------|-------------------|------------------|--------------------------------|----------------------|------------------------------------|---------------------------|----------------------------|---------------------------|
| Russian Federation          | 163143            | 0.3 (0.3, 0.3)               | 13.0 (12.9, 13.2) | 0.1 (0.1, 0.0)   | 0.2 (0.1, 0.6)                 | 86.5 (86.7, 85.8)    | 26.5 (24.0, 31.6)                  | 11.8 (11.9, 12.6)         | 38.2 (35.9, 44.2)          | 1.9 (1.8, 2.2)            |
| Saint Kitts and Nevis       | 126               | 0.0 (0.0, 0.0)               | 0.0 (0.0, 3.0)    | 3.0 (2.2, 0.0)   | 0.0 (0.0, 0.0)                 | 97.0 (97.8, 97.0)    | 0.0 (0.0, 0.0)                     | 0.0 (0.0, 0.0)            | 0.0 (0.0, 0.0)             | 0.1 (0.1, 0.2)            |
| Saint Lucia                 | 162               | 0.0 (0.0, 0.0)               | 0.0 (0.0, 0.0)    | 0.0 (0.0, 0.0)   | 0.0 (0.0, 0.0)                 | 100.0 (100.0, 100.0) | 0.0 (0.0, 0.0)                     | 0.0 (0.0, 0.0)            | 0.0 (0.0, 0.0)             | 0.0 (0.0, 0.0)            |
| Saint Martin                | 44                | 0.8 (0.0, 0.8)               | 3.1 (0.0, 8.1)    | 28.6 (28.8, 0.0) | 1.1 (0.0, 26.1)                | 66.4 (71.2, 65.0)    | 0.0 (0.0, 0.0)                     | 0.0 (0.0, 0.0)            | 0.0 (0.0, 0.0)             | - (-, -)                  |
| Saint Pierre and Miquelon   | 181               | 1.8 (1.8, 1.8)               | 7.8 (7.8, 1.4)    | 0.0 (0.0, 0.0)   | 0.0 (0.0, 6.4)                 | 90.4 (90.4, 90.4)    | 0.1 (0.1, 0.1)                     | 0.0 (0.0, 0.0)            | 0.1 (0.1, 0.1)             | - (-, -)                  |
| Saint Vincent and Grenadine | 212               | 0.0 (0.0, 0.0)               | 2.5 (1.5, 2.5)    | 0.0 (1.0, 0.0)   | 0.0 (0.0, 0.0)                 | 97.5 (97.5, 97.5)    | 0.0 (0.0, 0.0)                     | 0.0 (0.0, 0.0)            | 0.0 (0.0, 0.0)             | 0.5 (0.4, 0.5)            |
| Samoa                       | 437               | 0.0 (0.0, 0.0)               | 0.7 (0.2, 1.5)    | 0.0 (0.0, 0.0)   | 0.0 (0.0, 0.0)                 | 99.3 (99.8, 98.5)    | 0.0 (0.0, 0.0)                     | 0.0 (0.0, 0.0)            | 0.0 (0.0, 0.0)             | 0.3 (0.2, 0.3)            |
| Sao Tome and Principe       | 252               | 0.0 (0.0, 0.2)               | 0.4 (0.4, 0.4)    | 0.0 (0.0, 0.0)   | 0.2 (0.2, 0.5)                 | 99.4 (99.4, 98.9)    | 0.0 (0.0, 0.0)                     | 0.0 (0.0, 0.0)            | 0.0 (0.0, 0.0)             | 1.1 (1.1, 1.4)            |
| Saudi Arabia                | 6330              | 10.8 (10.1, 10.8)            | 34.9 (17.0, 39.0) | 5.6 (23.1, 0.0)  | 0.4 (0.1, 6.1)                 | 48.3 (49.7, 44.0)    | 4.1 (3.2, 6.1)                     | 3.9 (3.6, 4.1)            | 8.0 (6.8, 10.2)            | 0.7 (0.6, 1.0)            |
| Senegal                     | 4146              | 0.0 (0.0, 0.0)               | 76.6 (81.2, 77.4) | 0.0 (0.0, 0.0)   | 11.0 (6.0, 11.0)               | 12.4 (12.8, 11.6)    | 5.0 (4.1, 6.1)                     | 1.6 (1.8, 1.8)            | 6.6 (5.9, 7.9)             | 21.3 (19.0, 25.5)         |
| Seychelles                  | 531               | 2.9 (2.9, 2.9)               | 6.0 (6.1, 6.1)    | 0.0 (0.0, 0.0)   | 4.6 (4.1, 4.7)                 | 86.5 (86.9, 86.3)    | 0.4 (0.3, 0.4)                     | 0.7 (0.6, 0.6)            | 1.1 (1.0, 1.1)             | 51.8 (44.9, 50.2)         |
| Sierra Leone                | 1932              | 0.0 (0.0, 0.0)               | 74.3 (75.0, 63.6) | 0.0 (0.0, 0.0)   | 3.1 (2.0, 14.0)                | 22.6 (23.0, 22.4)    | 3.7 (3.3, 4.0)                     | 1.2 (1.3, 1.2)            | 4.8 (4.6, 5.2)             | 126.5 (121.2, 136.1)      |
| Singapore                   | 416               | 21.9 (21.9, 21.9)            | 1.1 (3.5, 1.5)    | 0.0 (0.0, 0.0)   | 2.6 (0.2, 2.6)                 | 74.4 (74.4, 74.0)    | 2.0 (1.9, 2.2)                     | 0.8 (0.7, 0.7)            | 2.7 (2.6, 2.9)             | 0.5 (0.5, 0.6)            |
| Slovenia                    | 40                | 43.4 (43.4, 43.4)            | 0.0 (0.0, 0.0)    | 0.0 (0.0, 0.0)   | 1.9 (0.0, 1.9)                 | 54.7 (56.6, 54.7)    | 0.1 (0.1, 0.1)                     | 0.1 (0.1, 0.1)            | 0.2 (0.2, 0.2)             | 0.3 (0.3, 0.3)            |
| Solomon Islands             | 8801              | 0.0 (0.0, 0.0)               | 7.2 (5.8, 10.0)   | 0.0 (0.0, 0.0)   | 0.2 (0.1, 0.3)                 | 92.6 (94.1, 89.7)    | 0.2 (0.1, 0.2)                     | 0.0 (0.0, 0.0)            | 0.2 (0.2, 0.3)             | 11.8 (9.9, 16.1)          |
| Somalia                     | 3600              | 0.0 (0.0, 0.0)               | 27.8 (27.0, 30.1) | 0.0 (0.0, 0.0)   | 0.4 (0.0, 0.5)                 | 71.8 (73.0, 69.4)    | 1.1 (1.1, 1.3)                     | 0.0 (0.0, 0.0)            | 1.2 (1.1, 1.3)             | 10.2 (9.6, 11.2)          |
| South Africa                | 3674              | 0.0 (0.0, 0.0)               | 11.5 (11.2, 10.7) | 0.0 (0.0, 0.0)   | 0.3 (0.1, 1.7)                 | 88.3 (88.7, 87.6)    | 0.7 (0.6, 1.0)                     | 0.1 (0.1, 0.1)            | 0.8 (0.7, 1.1)             | 0.2 (0.2, 0.3)            |
| Spain                       | 7154              | 13.9 (11.8, 14.2)            | 8.0 (7.3, 4.5)    | 0.1 (4.3, 0.0)   | 4.5 (3.0, 8.5)                 | 73.5 (73.6, 72.8)    | 9.4 (8.6, 11.3)                    | 3.2 (3.1, 2.6)            | 12.7 (11.7, 14.0)          | 0.8 (0.7, 0.9)            |
| SpecialAreas                | 10851             | 0.0 (0.0, 0.0)               | 0.2 (0.0, 0.2)    | 0.0 (0.2, 0.0)   | 0.0 (0.0, 0.0)                 | 99.8 (99.8, 99.8)    | 0.0 (0.0, 0.0)                     | 0.0 (0.0, 0.0)            | 0.0 (0.0, 0.0)             | - (-, -)                  |
| Sri Lanka                   | 2832              | 4.7 (5.0, 4.7)               | 13.8 (36.2, 9.9)  | 0.4 (10.7, 1.7)  | 39.2 (4.3, 38.8)               | 41.9 (43.8, 38.8)    | 1.4 (0.9, 2.2)                     | 0.8 (0.7, 0.9)            | 2.2 (1.7, 3.1)             | 2.7 (2.0, 3.7)            |
| Sudan                       | 1233              | 0.0 (0.0, 0.0)               | 43.0 (0.0, 37.1)  | 0.0 (43.9, 0.0)  | 0.9 (0.0, 6.7)                 | 56.1 (56.1, 56.1)    | 0.1 (0.0, 0.3)                     | 0.0 (0.0, 0.0)            | 0.1 (0.0, 0.4)             | 0.1 (0.0, 0.3)            |
| Suriname                    | 1369              | 11.9 (11.9, 11.9)            | 23.4 (54.0, 45.5) | 0.0 (0.0, 0.0)   | 33.7 (2.8, 11.6)               | 31.0 (31.3, 31.0)    | 14.3 (13.5, 15.4)                  | 20.9 (21.4, 18.4)         | 35.2 (34.9, 33.9)          | 929.5 (923.7, 895.7)      |
| Svalbard and Jan Mayen      | 7887              | 0.0 (0.0, 0.0)               | 0.1 (0.1, 0.1)    | 0.0 (0.0, 0.0)   | 0.0 (0.0, 0.0)                 | 99.9 (99.9, 99.9)    | 0.0 (0.0, 0.0)                     | 0.0 (0.0, 0.0)            | 0.0 (0.0, 0.0)             | - (-, -)                  |
| Sweden                      | 19606             | 1.1 (1.0, 1.1)               | 20.1 (17.4, 20.5) | 0.8 (3.5, 0.1)   | 1.2 (0.7, 2.8)                 | 76.9 (77.4, 75.5)    | 5.8 (5.4, 7.1)                     | 2.4 (2.2, 2.1)            | 8.1 (7.6, 9.2)             | 1.4 (1.3, 1.5)            |
| Syrian Arab Rep             | 193               | 0.8 (0.0, 0.8)               | 10.2 (0.0, 9.5)   | 0.0 (20.2, 0.0)  | 9.8 (0.0, 11.6)                | 79.1 (79.8, 78.0)    | 0.0 (0.0, 0.0)                     | 0.0 (0.0, 0.0)            | 0.0 (0.0, 0.1)             | - (-, -)                  |
| Taiwan, Province of         | 2319              | 35.5 (35.5, 35.5)            | 4.0 (4.9, 3.3)    | 0.0 (0.0, 0.0)   | 2.2 (0.7, 3.6)                 | 58.3 (58.9, 57.6)    | 3.7 (3.4, 4.1)                     | 2.4 (2.5, 2.5)            | 6.1 (5.9, 6.5)             | - (-, -)                  |
| Tanzania, United Republic   | 3564              | 0.1 (0.1, 0.1)               | 69.3 (69.6, 71.1) | 0.0 (0.0, 0.0)   | 1.9 (0.9, 2.1)                 | 28.7 (29.4, 26.6)    | 2.2 (2.1, 2.5)                     | 0.5 (0.5, 0.5)            | 2.8 (2.6, 3.0)             | 3.5 (3.3, 3.8)            |
| Thailand                    | 8572              | 9.4 (9.4, 9.4)               | 24.6 (36.8, 21.8) | 0.0 (0.0, 0.0)   | 33.1 (20.3, 36.6)              | 33.0 (33.5, 32.3)    | 57.3 (52.0, 69.4)                  | 89.9 (87.3, 85.8)         | 147.3 (139.3, 155.2)       | 28.6 (27.0, 30.1)         |
| Togo                        | 75                | 0.0 (0.0, 0.0)               | 11.0 (41.3, 11.0) | 0.0 (0.0, 0.0)   | 30.4 (0.0, 30.4)               | 58.7 (58.7, 58.7)    | 0.0 (0.0, 0.0)                     | 0.0 (0.0, 0.0)            | 0.0 (0.0, 0.0)             | 0.1 (0.0, 0.4)            |
| Tokelau                     | 115               | 0.0 (0.0, 0.0)               | 0.0 (0.0, 0.0)    | 0.0 (0.0, 0.0)   | 0.0 (0.0, 0.0)                 | 100.0 (100.0, 100.0) | 0.0 (0.0, 0.0)                     | 0.0 (0.0, 0.0)            | 0.0 (0.0, 0.0)             | - (-, -)                  |
| Tonga                       | 779               | 0.0 (0.0, 0.0)               | 4.5 (3.2, 5.7)    | 0.0 (0.0, 0.0)   | 6.1 (6.0, 5.3)                 | 89.4 (90.7, 89.1)    | 0.2 (0.2, 0.3)                     | 0.0 (0.0, 0.0)            | 0.2 (0.2, 0.3)             | - (-, -)                  |
| Trinidad and Tobago         | 651               | 3.3 (3.3, 3.3)               | 16.5 (17.5, 13.5) | 0.0 (0.0, 0.0)   | 2.2 (0.7, 6.6)                 | 78.0 (78.5, 76.6)    | 0.7 (0.7, 0.9)                     | 0.2 (0.2, 0.2)            | 1.0 (0.9, 1.1)             | 3.5 (3.2, 4.0)            |
| Tunisia                     | 1841              | 2.2 (2.2, 2.4)               | 49.5 (38.9, 44.9) | 0.7 (19.3, 0.0)  | 13.3 (5.4, 20.0)               | 34.2 (34.2, 32.7)    | 5.1 (4.0, 6.6)                     | 2.8 (3.0, 2.7)            | 7.9 (7.0, 9.3)             | 16.3 (14.4, 19.2)         |
| Turkey                      | 7433              | 4.8 (3.9, 8.0)               | 4.7 (1.1, 3.9)    | 5.7 (10.6, 0.2)  | 2.7 (1.6, 6.6)                 | 82.0 (82.8, 81.3)    | 1.6 (1.1, 2.5)                     | 11.8 (11.8, 11.8)         | 13.4 (12.9, 14.4)          | 1.2 (1.2, 1.3)            |
| Tuvalu                      | 198               | 0.0 (0.0, 0.0)               | 2.3 (2.3, 2.3)    | 0.0 (0.0, 0.0)   | 0.0 (0.0, 0.0)                 | 97.7 (97.7, 97.7)    | 0.0 (0.0, 0.0)                     | 0.0 (0.0, 0.0)            | 0.0 (0.0, 0.0)             | 3.4 (3.4, 3.5)            |
| Ukraine                     | 4351              | 2.0 (0.6, 2.6)               | 46.2 (21.6, 49.0) | 6.6 (33.8, 0.3)  | 2.3 (0.7, 5.4)                 | 43.0 (43.3, 42.6)    | 1.6 (1.2, 2.4)                     | 0.5 (0.5, 0.8)            | 2.1 (1.7, 3.2)             | 1.2 (1.0, 1.8)            |
| United Arab Emirates        | 3242              | 11.3 (11.3, 11.3)            | 50.1 (50.7, 30.0) | 0.0 (0.0, 0.0)   | 5.2 (2.7, 28.4)                | 33.4 (35.2, 30.3)    | 8.5 (7.5, 11.0)                    | 3.4 (3.0, 3.3)            | 11.9 (10.5, 14.4)          | 2.4 (2.1, 2.9)            |
| United Kingdom              | 18132             | 11.7 (11.7, 11.8)            | 20.4 (21.0, 18.1) | 0.0 (0.0, 0.0)   | 1.7 (1.0, 4.2)                 | 66.2 (66.4, 65.9)    | 116.0 (114.4, 125.3)               | 40.5 (40.2, 39.9)         | 156.5 (154.6, 165.2)       | 4.7 (4.6, 4.9)            |
| United States of America    | 153159            | 15.0 (15.3, 16.2)            | 22.7 (22.7, 17.7) | 0.1 (0.2, 0.0)   | 2.0 (1.4, 6.1)                 | 60.2 (60.3, 60.0)    | 705.8 (719.1, 887.3)               | 415.3 (406.3, 441.2)      | 1121.1 (1125.4, 1328.6)    | 4.1 (4.1, 4.9)            |
| Uruguay                     | 1808              | 0.0 (0.0, 0.0)               | 34.2 (32.9, 33.7) | 0.0 (0.0, 0.0)   | 0.5 (0.1, 3.0)                 | 65.3 (66.9, 63.3)    | 0.5 (0.5, 0.8)                     | 0.3 (0.2, 0.2)            | 0.8 (0.7, 1.0)             | 1.0 (0.9, 1.2)            |
| Vanuatu                     | 2930              | 0.0 (0.0, 0.0)               | 1.7 (1.7, 2.4)    | 0.0 (0.0, 0.0)   | 0.0 (0.0, 0.0)                 | 98.3 (98.3, 97.6)    | 0.0 (0.0, 0.0)                     | 0.0 (0.0, 0.0)            | 0.0 (0.0, 0.0)             | 3.9 (3.9, 4.1)            |
| Venezuela                   | 8218              | 9.2 (7.5, 9.1)               | 45.7 (39.5, 45.7) | 0.8 (12.5, 0.1)  | 6.6 (2.7, 8.0)                 | 37.8 (37.8, 37.1)    | 13.5 (9.8, 19.2)                   | 62.1 (62.7, 63.9)         | 75.6 (72.4, 83.2)          | - (-, -)                  |
| Viet Nam                    | 17242             | 30.8 (30.8, 30.7)            | 21.1 (27.5, 17.4) | 0.0 (0.0, 0.0)   | 17.3 (10.4, 22.5)              | 30.8 (31.2, 29.4)    | 207.5 (202.8, 240.6)               | 95.2 (95.7, 96.9)         | 302.8 (298.5, 337.5)       | 70.5 (69.5, 78.5)         |
| Virgin Islands, U.S.        | 319               | 0.0 (0.0, 0.0)               | 0.0 (0.0, 0.7)    | 0.0 (0.0, 0.0)   | 0.0 (0.0, 0.0)                 | 100.0 (100.0, 99.3)  | 0.0 (0.0, 0.0)                     | 0.0 (0.0, 0.0)            | 0.0 (0.0, 0.0)             | - (-, -)                  |
| Wallis and Futuna           | 121               | 0.0 (0.0, 0.0)               | 11.7 (11.1, 9.9)  | 0.0 (0.0, 0.0)   | 0.0 (0.0, 1.7)                 | 88.3 (88.9, 88.3)    | 0.0 (0.0, 0.0)                     | 0.0 (0.0, 0.0)            | 0.0 (0.0, 0.0)             | - (-, -)                  |
| West Bank and Gaza          | 41                | 0.0 (0.0, 0.0)               | 6.3 (0.0, 1.2)    | 0.0 (9.1, 0.0)   | 2.8 (0.0, 9.0)                 | 90.9 (90.9, 89.8)    | 0.0 (0.0, 0.0)                     | 0.0 (0.0, 0.0)            | 0.0 (0.0, 0.0)             | 0.0 (0.0, 0.0)            |
| Yemen                       | 3235              | 0.0 (0.0, 0.0)               | 31.9 (20.0, 23.2) | 0.2 (9.9, 0.0)   | 3.8 (3.1, 15.3)                | 64.1 (66.9, 61.4)    | 0.4 (0.4, 0.6)                     | 0.1 (0.0, 0.1)            | 0.5 (0.4, 0.7)             | - (-, -)                  |
| Total                       | 1692929           | 6.6 (6.5, 6.8)               | 20.4 (20.5, 19.1) | 0.4 (1.3, 0.3)   | 3.7 (2.3, 5.8)                 | 68.9 (69.4, 68.0)    | 4182.1 (4082.2, 4959.0)            | 8397.7 (8394.5, 8395.7)   | 12579.8 (12476.7, 13354.6) | 12.0 (11.9, 12.8)         |

**Table S2:** Country-wise unit costs of dike protection and accommodation. Protection is given in Million USD per meter of dike height and per kilometre of dike length; accommodation is given in Thousand USD per person per meter of flood-proofing (2011 PPP values).

| Country                           | Protection (M. USD) | Accommodation (K. USD) |
|-----------------------------------|---------------------|------------------------|
| Aaland                            | 5.1                 | 3.7                    |
| Albania                           | 5.1                 | 3.7                    |
| Algeria                           | 5.1                 | 3.7                    |
| American Samoa                    | 9.2                 | 6.6                    |
| Angola                            | 6.1                 | 4.4                    |
| Anguilla                          | 11.2                | 8.0                    |
| Antigua and Barbuda               | 6.1                 | 4.4                    |
| Argentina                         | 20.4                | 14.6                   |
| Armenia                           | 10.2                | 7.3                    |
| Aruba                             | 4.1                 | 2.9                    |
| Australia                         | 9.2                 | 6.6                    |
| Azerbaijan                        | 10.2                | 7.3                    |
| Bahamas                           | 7.1                 | 5.1                    |
| Bahrain                           | 8.2                 | 5.9                    |
| Bangladesh                        | 3.1                 | 2.2                    |
| Barbados                          | 6.1                 | 4.4                    |
| Belarus                           | 10.2                | 7.3                    |
| Belgium                           | 10.2                | 7.3                    |
| Belize                            | 7.1                 | 5.1                    |
| Benin                             | 7.1                 | 5.1                    |
| Bermuda                           | 4.1                 | 2.9                    |
| Bonaire, Saba and Saint Eustatius | 4.1                 | 2.9                    |
| Bosnia and Herzegovia             | 3.1                 | 2.2                    |
| Bouvetisland                      | 6.1                 | 4.4                    |
| Brazil                            | 20.4                | 14.6                   |
| British Indian Ocean Territory    | 11.2                | 8.0                    |
| British Virgin Islands            | 11.2                | 8.0                    |
| Brunei Darussalam                 | 7.1                 | 5.1                    |
| Bulgaria                          | 5.1                 | 3.7                    |
| Cambodia                          | 13.3                | 9.5                    |
| Cameroon                          | 8.2                 | 5.9                    |
| Canada                            | 8.2                 | 5.9                    |
| Cape Verde                        | 7.1                 | 5.1                    |
| Cayman Islands                    | 11.2                | 8.0                    |
| Chile                             | 6.1                 | 4.4                    |
| China                             | 15.3                | 11.0                   |
| Christmas Island                  | 9.2                 | 6.6                    |
| Cocos Islands                     | 9.2                 | 6.6                    |
| Colombia                          | 9.2                 | 6.6                    |
| Comoros                           | 7.1                 | 5.1                    |
| Congo                             | 17.3                | 12.4                   |
| Congo, Democratic Republic        | 8.2                 | 5.9                    |
| Cook Islands                      | 5.1                 | 3.7                    |
| Costa Rica                        | 7.1                 | 5.1                    |
| Cote de Ivoire                    | 7.1                 | 5.1                    |
| Croatia                           | 3.1                 | 2.2                    |
| Cuba                              | 5.1                 | 3.7                    |
| Curacao                           | 4.1                 | 2.9                    |
| Cyprus                            | 5.1                 | 3.7                    |
| Denmark                           | 10.2                | 7.3                    |
| Djibouti                          | 5.1                 | 3.7                    |
| Dominica                          | 8.2                 | 5.9                    |
| Dominican Republic                | 6.1                 | 4.4                    |
| East Timor                        | 2.0                 | 1.5                    |
| Ecuador                           | 5.1                 | 3.7                    |
| Egypt                             | 3.1                 | 2.2                    |
| El Salvador                       | 9.2                 | 6.6                    |
| Equatorial Guinea                 | 7.1                 | 5.1                    |
| Eritrea                           | 4.1                 | 2.9                    |
| Estonia                           | 10.2                | 7.3                    |
| Ethiopia                          | 7.1                 | 5.1                    |
| Falkland Islands                  | 11.2                | 8.0                    |
| Faroe Islands                     | 10.2                | 7.3                    |
| Fiji                              | 7.1                 | 5.1                    |
| Finland                           | 5.1                 | 3.7                    |
| France                            | 7.1                 | 5.1                    |
| French Guiana                     | 6.1                 | 4.4                    |
| French Polynesia                  | 4.1                 | 2.9                    |
| French Southern Territories       | 7.1                 | 5.1                    |
| Gabon                             | 13.3                | 9.5                    |
| Gambia                            | 10.2                | 7.3                    |
| Georgia                           | 10.2                | 7.3                    |
| Germany                           | 10.2                | 7.3                    |
| Ghana                             | 10.2                | 7.3                    |
| Gibraltar                         | 11.2                | 8.0                    |
| Greece                            | 4.1                 | 2.9                    |
| Greenland                         | 10.2                | 7.3                    |
| Grenada                           | 8.2                 | 5.9                    |
| Guadeloupe                        | 4.1                 | 2.9                    |

*Continued on next page*

Table S2 continued

| Country                            | Protection (M. USD) | Accommodation (K. USD) |
|------------------------------------|---------------------|------------------------|
| Guam                               | 9.2                 | 6.6                    |
| Guatemala                          | 10.2                | 7.3                    |
| Guernsey                           | 11.2                | 8.0                    |
| Guinea                             | 13.3                | 9.5                    |
| Guinea-Bissau                      | 13.3                | 9.5                    |
| Guyana                             | 13.3                | 9.5                    |
| Haiti                              | 6.1                 | 4.4                    |
| Heard Island and McDonald Islands  | 9.2                 | 6.6                    |
| Honduras                           | 10.2                | 7.3                    |
| Hong Kong, China SAR               | 7.1                 | 5.1                    |
| Iceland                            | 9.2                 | 6.6                    |
| India                              | 13.3                | 9.5                    |
| Indonesia                          | 4.1                 | 2.9                    |
| Iran, Islamic Republic             | 7.1                 | 5.1                    |
| Iraq                               | 12.2                | 8.8                    |
| Ireland                            | 11.2                | 8.0                    |
| Isle of Man                        | 11.2                | 8.0                    |
| Israel                             | 5.1                 | 3.7                    |
| Italy                              | 7.1                 | 5.1                    |
| Jamaica                            | 7.1                 | 5.1                    |
| Japan                              | 14.3                | 10.2                   |
| Jersey                             | 11.2                | 8.0                    |
| Jordan                             | 5.1                 | 3.7                    |
| Kazakhstan                         | 10.2                | 7.3                    |
| Kenya                              | 15.3                | 11.0                   |
| Kiribati                           | 6.1                 | 4.4                    |
| Korea, Democratic Peoples Republic | 7.1                 | 5.1                    |
| Korea, Republic                    | 43.9                | 31.5                   |
| Kosovo                             | 5.1                 | 3.7                    |
| Kuwait                             | 8.2                 | 5.9                    |
| Kyrgyzstan                         | 10.2                | 7.3                    |
| Latvia                             | 10.2                | 7.3                    |
| Lebanon                            | 3.1                 | 2.2                    |
| Liberia                            | 7.1                 | 5.1                    |
| Libya                              | 8.2                 | 5.9                    |
| Lithuania                          | 10.2                | 7.3                    |
| Macau                              | 8.2                 | 5.9                    |
| Madagascar                         | 7.1                 | 5.1                    |
| Malaysia                           | 9.2                 | 6.6                    |
| Maldives                           | 7.1                 | 5.1                    |
| Malta                              | 5.1                 | 3.7                    |
| Marshall Islands                   | 4.1                 | 2.9                    |
| Martinique                         | 4.1                 | 2.9                    |
| Mauritania                         | 16.3                | 11.7                   |
| Mauritius                          | 7.1                 | 5.1                    |
| Mayotte                            | 7.1                 | 5.1                    |
| Mexico                             | 12.2                | 8.8                    |
| Micronesia, Federal State of       | 4.1                 | 2.9                    |
| Moldova                            | 10.2                | 7.3                    |
| Monaco                             | 2.0                 | 1.5                    |
| Montenegro                         | 5.1                 | 3.7                    |
| Montserrat                         | 11.2                | 8.0                    |
| Morocco                            | 8.2                 | 5.9                    |
| Mozambique                         | 12.2                | 8.8                    |
| Myanmar                            | 20.4                | 14.6                   |
| Namibia                            | 15.3                | 11.0                   |
| Nauru                              | 9.2                 | 6.6                    |
| Netherlands                        | 10.2                | 7.3                    |
| New Caledonia                      | 4.1                 | 2.9                    |
| New Zealand                        | 5.1                 | 3.7                    |
| Nicaragua                          | 14.3                | 10.2                   |
| Nigeria                            | 12.2                | 8.8                    |
| Niue                               | 5.1                 | 3.7                    |
| Norfolk Island                     | 9.2                 | 6.6                    |
| Northern Mariana Islands           | 9.2                 | 6.6                    |
| Norway                             | 6.1                 | 4.4                    |
| Oman                               | 7.1                 | 5.1                    |
| Pakistan                           | 10.2                | 7.3                    |
| Palau                              | 4.1                 | 2.9                    |
| Panama                             | 10.2                | 7.3                    |
| Papua New Guinea                   | 6.1                 | 4.4                    |
| Peru                               | 5.1                 | 3.7                    |
| Philippines                        | 3.1                 | 2.2                    |
| Pitcairn Islands                   | 11.2                | 8.0                    |
| Poland                             | 10.2                | 7.3                    |
| Portugal                           | 4.1                 | 2.9                    |
| Puerto Rico                        | 6.1                 | 4.4                    |
| Qatar                              | 5.1                 | 3.7                    |
| Reunion                            | 3.1                 | 2.2                    |
| Romania                            | 10.2                | 7.3                    |
| Russian Federation                 | 10.2                | 7.3                    |
| Saint Barthelemy                   | 7.1                 | 5.1                    |
| Saint Helena                       | 11.2                | 8.0                    |
| Saint Kitts and Nevis              | 4.1                 | 2.9                    |
| Saint Lucia                        | 8.2                 | 5.9                    |
| Saint Martin                       | 7.1                 | 5.1                    |
| Saint Pierre and Miquelon          | 7.1                 | 5.1                    |

Continued on next page

Table S2 continued

| Country                                      | Protection (M. USD) | Accommodation (K. USD) |
|----------------------------------------------|---------------------|------------------------|
| Saint Vincent and Grenadine                  | 4.1                 | 2.9                    |
| Samoa                                        | 6.1                 | 4.4                    |
| Sao Tome and Principe                        | 4.1                 | 2.9                    |
| Saudi Arabia                                 | 7.1                 | 5.1                    |
| Senegal                                      | 10.2                | 7.3                    |
| Serbia                                       | 5.1                 | 3.7                    |
| Seychelles                                   | 7.1                 | 5.1                    |
| Sierra Leone                                 | 10.2                | 7.3                    |
| Singapore                                    | 10.2                | 7.3                    |
| Sint Maarten                                 | 10.2                | 7.3                    |
| Slovenia                                     | 3.1                 | 2.2                    |
| Solomon Islands                              | 6.1                 | 4.4                    |
| Somalia                                      | 15.3                | 11.0                   |
| South Africa                                 | 17.3                | 12.4                   |
| South Georgia and the South Sandwich Islands | 11.2                | 8.0                    |
| South Sudan                                  | 7.1                 | 5.1                    |
| Spain                                        | 5.1                 | 3.7                    |
| Special Areas                                | 11.2                | 8.0                    |
| Sri Lanka                                    | 3.1                 | 2.2                    |
| Sudan                                        | 7.1                 | 5.1                    |
| Suriname                                     | 10.2                | 7.3                    |
| Svalbard and Jan Mayen                       | 6.1                 | 4.4                    |
| Sweden                                       | 5.1                 | 3.7                    |
| Syrian Arab Rep                              | 5.1                 | 3.7                    |
| Taiwan, Province of                          | 2.0                 | 1.5                    |
| Tajikistan                                   | 10.2                | 7.3                    |
| Tanzania, United Republic                    | 7.1                 | 5.1                    |
| Thailand                                     | 13.3                | 9.5                    |
| Togo                                         | 7.1                 | 5.1                    |
| Tokelau                                      | 5.1                 | 3.7                    |
| Tonga                                        | 7.1                 | 5.1                    |
| Trinidad and Tobago                          | 9.2                 | 6.6                    |
| Tunisia                                      | 15.3                | 11.0                   |
| Turkey                                       | 5.1                 | 3.7                    |
| Turkmenistan                                 | 10.2                | 7.3                    |
| Turks and Caicos Islands                     | 11.2                | 8.0                    |
| Tuvalu                                       | 3.1                 | 2.2                    |
| Ukraine                                      | 10.2                | 7.3                    |
| United Arab Emirates                         | 8.2                 | 5.9                    |
| United Kingdom                               | 11.2                | 8.0                    |
| United States Minor Outlying Islands         | 9.2                 | 6.6                    |
| United States of America                     | 9.2                 | 6.6                    |
| Uruguay                                      | 15.3                | 11.0                   |
| Uzbekistan                                   | 10.2                | 7.3                    |
| Vanuatu                                      | 7.1                 | 5.1                    |
| Vatikan                                      | 7.1                 | 5.1                    |
| Venezuela                                    | 14.3                | 10.2                   |
| Viet Nam                                     | 11.2                | 8.0                    |
| Virgin Islands, U.S.                         | 6.1                 | 4.4                    |
| Wallis and Futuna                            | 7.1                 | 5.1                    |
| West Bank and Gaza                           | 3.1                 | 2.2                    |
| Western Sahara                               | 5.1                 | 3.7                    |
| Yemen                                        | 3.1                 | 2.2                    |
